1 **Tumor-Cell Invasion Initiates at Invasion Hotspots, an Epithelial Tissue-Intrinsic**  
2 **Microenvironment**

3  
4 Rei Kobayashi<sup>1,2</sup>, Hiroaki Takishima<sup>1</sup>, Sheng Deng<sup>1</sup>, Yasuyuki Fujita<sup>1,2</sup> and Yoichiro  
5 Tamori<sup>1,2\*</sup>

6  
7 <sup>1</sup>Department of Molecular Oncology, Kyoto University Graduate School of Medicine,  
8 Kyoto, Japan

9  
10 <sup>2</sup>Division of Molecular Oncology, Institute for Genetic Medicine, Hokkaido University  
11 Graduate School of Chemical Sciences and Engineering, Sapporo, Japan

12  
13 \*Correspondence: [tamori.yoichiro.6z@kyoto-u.ac.jp](mailto:tamori.yoichiro.6z@kyoto-u.ac.jp)

14  
15 Keywords: *Drosophila*, imaginal discs, epithelial tissues, neoplastic tumor suppressor  
16 genes, Ras, cancer cell invasion, tumor microenvironment

17

1 **Summary**

2

3 Malignant cancers emerge in epithelial tissues through a progressive process in which a  
4 single transformed mutant cell becomes tumorigenic and invasive. Although numerous  
5 genes involved in the malignant transformation of cancer cells have been described,  
6 how tumor cells launch an invasion into the basal side of epithelial tissues remains  
7 elusive. Here, using a *Drosophila* wing imaginal disc epithelia, we show that genetically  
8 mosaic clones of cells mutant for a neoplastic-tumor-suppressor gene (*nTSG*) in  
9 combination with the oncogenic Ras (*Ras<sup>V12</sup>*) expression initiate invasion into the basal  
10 side of the epithelial layer at specific spots in the epithelial tissue. In this “invasion  
11 hotspot”, the oncogenic double-mutant cells activate c-Jun N-terminal kinase (JNK)  
12 signaling, which causes basal extrusion of the double-mutant cells and destruction of  
13 basement membrane through upregulation of a matrix metalloprotease, MMP1.  
14 Conversely, in other regions of the epithelial tissue, the double-mutant cells do not  
15 strongly activate JNK, deviate from the apical side of the epithelial layer, and show  
16 benign tumor growth in the lumen. These data indicate that the onset of tumor-cell  
17 invasion is highly dependent on the tissue-intrinsic local microenvironment. Given the  
18 conservation of genetic signaling pathways involved in this process, initiation of tumor-  
19 cell invasion from invasion hotspots in *Drosophila* wing imaginal epithelia could help  
20 us to understand the developmental mechanisms of invasive cancers.

21

## 1 1. Introduction

2  
3 An epithelial tumor generally originates from a single transformed mutant cell  
4 among the highly organized layer of cells which compose the epithelial tissue[1]. If the  
5 genetic mutation causes activation of an oncogene or inactivation of a tumor-suppressor  
6 gene, the mutant cell will become a pro-tumor cell with the potential to be cancerous.  
7 Such nascent pro-tumor cells that emerged within an epithelial layer would evolve into  
8 malignant cells with metastatic phenotypes through subsequent transformations over  
9 time[1–4].

10  
11 Tumor development entails a progressive disruption of tissue organization and  
12 unleashed proliferation. This indicates that tumor cells deteriorate tissue integrity or  
13 evade the robustly organized tissue environment in tumorigenesis[3]. Despite the  
14 deterioration of tissue structures, if a tumor grows at the local place and does not spread  
15 to other tissues, the tumor can be considered benign. In other words, metastasis from the  
16 primary site is the crucial event in cancer progression that transforms a locally growing  
17 benign tumor into malignant neoplasms and a life-threatening disease[1].

18  
19 The first step of the metastatic cascade is invasion, in which tumor cells leave the  
20 epithelial layers, penetrate the underlying basement membrane, and migrate through the  
21 extracellular matrix (ECM) into the surrounding tissue[5,6]. The tumor-cell invasion  
22 includes various cellular activities such as activation of signaling pathways that control  
23 cytoskeletal dynamics and promote cellular survival, turnover of cell-cell and cell-  
24 matrix junctions, epithelial-mesenchymal transition (EMT), and proteolysis-dependent  
25 ECM degradation, followed by active tumor cell migration into the adjacent tissue[7,8].  
26 Although numerous genes and signaling pathways involving these different aspects in  
27 tumor-cell invasion have been identified, how certain mutant cells escape from the  
28 epithelial layer and what cellular and molecular events occur to launch invasive  
29 behaviors *in vivo* tissues remain largely elusive[4,7].

30  
31 Recent studies especially using the genetically mosaic analysis tools in  
32 *Drosophila melanogaster* have greatly contributed to better understanding of the  
33 molecular and cellular mechanisms of the early cancer development *in vivo*[9–11]. For  
34 example, genetic experiments in *Drosophila* have revealed that the emergence of  
35 transformed pro-tumor cells within a normal epithelial layer leads to complex  
36 interactions between pro-tumor cells and healthy neighbors[12]. One of such

1 interactions is cell competition, a competitive cellular interaction which occurs when  
2 neighboring cells differ in intrinsic cellular properties contributing to selective  
3 elimination of either cell type[12–14]. Studies in *Drosophila* epithelial tissues such as  
4 developing imaginal discs have shown that genetically mosaic clones mutant for a  
5 group of tumor-suppressor genes identified in *Drosophila* – *lethal giant larvae (lgl)*,  
6 *discs large (dlg)*, and *scribble (scrib)* – are outcompeted by normal neighbors and are  
7 therefore eliminated from host tissues[15–18]. Similar cell competition-dependent cell  
8 death and elimination of Scribble-knockdown cells have also been demonstrated in  
9 mammalian cells using the Madin-Darby Canine Kidney (MDCK) epithelial cell  
10 line[19,20]. These tumor suppressor genes play key roles in the formation of apicobasal  
11 cell polarity and regulation of the planar spindle orientation during mitotic cell division  
12 in developing epithelial tissues like *Drosophila* imaginal discs[21–24]. When imaginal-  
13 disc epithelial cells in *Drosophila* larvae have a homozygous mutation for any of these  
14 three genes, the normally monolayered epithelium loses its organized structure, fails to  
15 differentiate, and overproliferates thus becoming a multilayered amorphous mass that  
16 fuses with adjacent tissues[22]. Loss or alteration in expression of the homologs of  
17 these genes in mammals including humans is also associated with tumor  
18 development[25–28]. The neoplastic phenotypes exhibited by mutant tissues led to the  
19 classification of these three genes as conserved neoplastic tumor-suppressor genes  
20 (nTSGs)[22].

21  
22 The fact that pro-tumor cells like *nTSG* mutants are eliminated by cell competition  
23 will closely relate to the data showing cancers arise through the sequential accumulation  
24 of multiple mutations in oncogenes and tumor suppressor genes[29,30]. Indeed, ectopic  
25 activation of oncogenic signaling pathways or genes such as *Notch*, JAK/STAT (Janus  
26 kinase/signal transducer and activator of transcription), or *Yorkie (Yki: Drosophila*  
27 homolog of Yes-associated protein, YAP) in *nTSG* mutant cells cooperatively induces  
28 tumorigenesis[15,18,31–33]. Among these oncogenes, an activated mutant form of Ras  
29 small GTPase, *Ras<sup>V12</sup>*, in combination with *nTSG* mutant cells causes highly invasive  
30 tumor phenotypes in *Drosophila* and mice[15,26,32,34,35].

31  
32 In this study, however, we show through detailed analyses of tumor cell  
33 phenotypes in *Drosophila* imaginal epithelia that the double mutant cells with a  
34 combinatorial mutation of *nTSG* and the oncogenic *Ras* frequently induce apical  
35 outgrowth and develop into benign tumors in the lumen. At the same time, the double-  
36 mutant cells induce basal extrusion and invasive behaviors only at a few specific spots

1 in the wing imaginal epithelia. These data suggest that the benign-or-malignant fate of  
2 tumor cells is highly dependent on a tissue-intrinsic microenvironment and show how  
3 the tumor cells begin invasion *in vivo* epithelial tissues.  
4

## 2. Results

### 2.1. *nTSG-Ras<sup>V12</sup> Double Mutant Cells Show Two Morphologically Distinct Tumor Phenotypes*

It has been shown that a combinatorial mutation of a neoplastic-tumor-suppressor gene (*nTSG*) and the oncogenic Ras (*Ras<sup>V12</sup>*) induces malignant tumor phenotypes such as intense proliferation and metastatic behaviors in *Drosophila* epithelial tissues[31,32]. For example, genetically mosaic mutant clones of *scribble* (*scrib*, one of the *nTSGs*) expressing *Ras<sup>V12</sup>* (*scrib-Ras<sup>V12</sup>* clones) generated in the eye imaginal discs and the optic lobes of *Drosophila* larvae show tumorigenic overgrowth and invade the ventral nerve cord[15,32]. To confirm that the genetically mosaic *scrib-Ras<sup>V12</sup>* clones show the invasive tumor phenotypes in *Drosophila* wing imaginal discs as previously reported in eye imaginal discs[15], we generated the double mutant *scrib-Ras<sup>V12</sup>* clones in the wing imaginal discs using mosaic analysis with a repressible cell marker (MARCM) system[36]. Interestingly, we found that the *scrib-Ras<sup>V12</sup>* clones showed two morphologically distinct tumor phenotypes in the wing imaginal discs. The *scrib-Ras<sup>V12</sup>* clones showed tumor growth at the apical side of the hinge region, so-called “tumor hotspots”[33], but they were in a rounded spherical configuration without protrusions (Figure 1a, c–f). On the other hand, those clones localized at the basal side of the epithelial layer intensely projected cellular protrusions and formed irregularly stretched amorphous shapes (Figure 1b–f).

To analyze the tumor development induced by *nTSG-Ras<sup>V12</sup>* double mutant clones, we also generated the mosaic clones expressing RNAi for *lethal giant larvae* (*lgl*), another *nTSGs*, in combination with *Ras<sup>V12</sup>* expression (*lgl<sup>RNAi</sup>-Ras<sup>V12</sup>*) in the wing imaginal epithelia using the heat-shock-induced flip-out Gal4 system[37]. Two days after clone induction, we observed that a subset of the *lgl<sup>RNAi</sup>-Ras<sup>V12</sup>* clones was localized at the apical or basal side of the epithelial layers (Figure S1a–c). Three days after clone induction, the *lgl<sup>RNAi</sup>-Ras<sup>V12</sup>* clones in the wing imaginal discs showed two morphologically distinct tumor phenotypes as we observed in the *scrib-Ras<sup>V12</sup>* clones (Figure 1a, b). While the *lgl<sup>RNAi</sup>-Ras<sup>V12</sup>* clones localized at the apical side of tumor hotspots formed round-shape benign-looking tumors without pseudopodial protrusions, those clones localized at the basal side of the epithelial layer formed stretched amorphous shapes and projected pseudopodial protrusions (Figure. 1g, i, j). The basement membrane labeled with anti-laminin  $\gamma$  antibody or collagen IV-GFP (Vkg-GFP) was degraded under these basally extruded clones with pseudopodial protrusions

1 (Figure. 1g, h). Four days after clone induction, the *IgI<sup>RNAi</sup>-Ras<sup>V12</sup>* clones grew larger,  
2 but the phenotypic differences between the apical and basal tumor clones were clearly  
3 observed (data not shown). In the same experimental condition, the mosaic clones  
4 expressing only GFP did not show any tumor phenotypes (Figure S1d–f). These  
5 observations suggest that the *nTSG-Ras<sup>V12</sup>* double mutant clones deviated from the  
6 apical side of the epithelial layer develop into benign tumors in the lumen, but they  
7 present with invasive behaviors when they are extruded from the basal side (Figure 1e).

8  
9 When the mosaic clones of *nTSG*-deficient cells without *Ras<sup>V12</sup>* are extruded from  
10 the basal side of epithelial layers, they undergo apoptosis and do not show tumorigenic  
11 phenotypes[23,33]. Therefore, we inferred that *Ras<sup>V12</sup>* expression is the primary cause  
12 of the invasive phenotypes shown by the *nTSG-Ras<sup>V12</sup>* clones. The phenotypes of  
13 *Ras<sup>V12</sup>*-expressing mosaic clones without an *nTSG* defect (*Ras<sup>V12</sup>* clone), however, were  
14 different from those observed in the *nTSG-Ras<sup>V12</sup>* clones. Two days after clone  
15 induction, a subset of the *Ras<sup>V12</sup>* clones in the wing pouch area was localized at the basal  
16 side of the epithelial layer and not labeled by the anti-cleaved DCP1 (Death caspase-1,  
17 an effector caspase of *Drosophila*) antibody (Figure. 2a, d). These basally extruded  
18 *Ras<sup>V12</sup>* clones forming a cyst-like structure in a spherical shape were localized between  
19 the epithelial layer and the underlying basement membrane and did not frequently show  
20 pseudopodial protrusions (Figure. 2a, f). Some clones located in the hinge area were  
21 localized at the apical side of the epithelial layer and did not show apoptosis (Figure. 2a,  
22 d). Three days after clone induction, the basally extruded *Ras<sup>V12</sup>* clones grew larger, did  
23 not show apoptosis, but remained to be in a cyst-like structure, and stay between the  
24 epithelial layer and the basement membrane (Figure. 2b, e). Although we found a few  
25 *Ras<sup>V12</sup>* clones located in the hinge regions showed pseudopodial protrusions at the basal  
26 side (Figure 6a), these observations suggest that *Ras<sup>V12</sup>* clones, in most settings, undergo  
27 benign tumor growth at the basal side of the epithelial layer. Similarly, the apically  
28 extruded *Ras<sup>V12</sup>* clones in the hinge area were growing without pseudopodial protrusions  
29 at the lumen (Figure. 2b, e).

30  
31

1 **Figure 1**

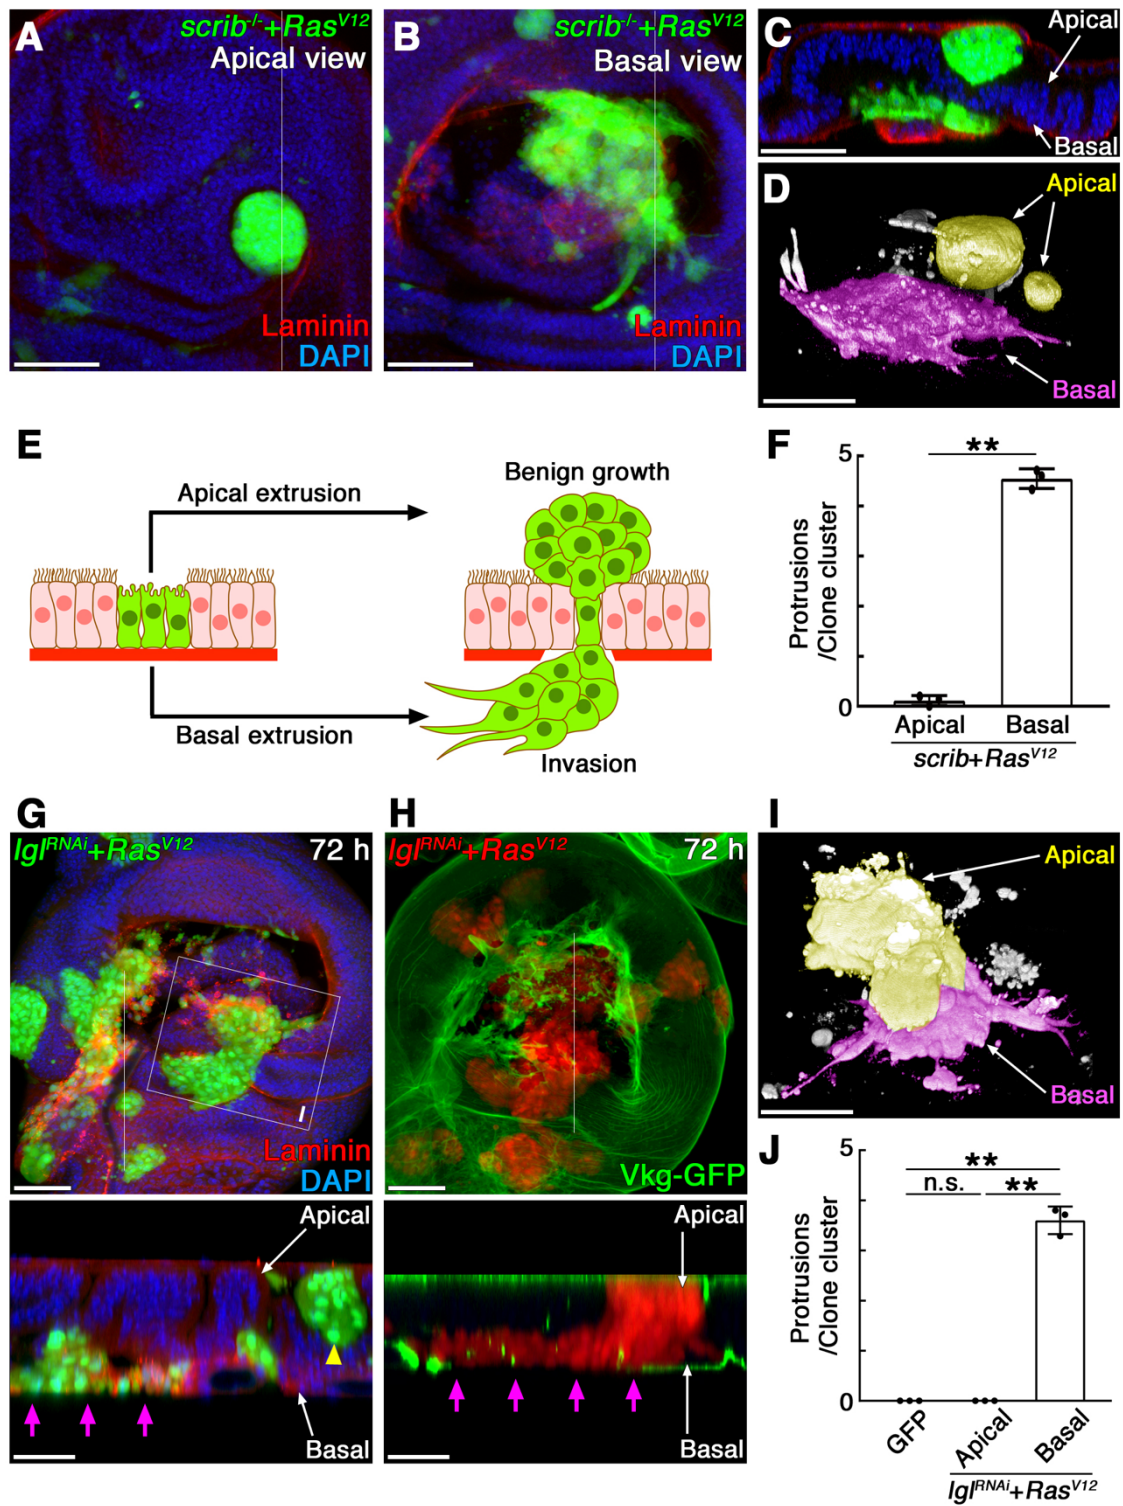



1 **Figure 1.** *nTSG-Ras<sup>V12</sup>* double mutant cells show two morphologically distinct tumor  
2 phenotypes in wing imaginal epithelia. (A–B) A wing imaginal disc with *scrib* mosaic  
3 mutant clones expressing *Ras<sup>V12</sup>* (labeled by GFP expression: green) four days after  
4 clone induction, stained for Laminin- $\gamma$  (red). The images are z-stack projections of 30  
5 confocal images of the apical side (A) or basal side (B) of the columnar epithelial layer.  
6 (C) A vertical section at a site indicated by a white line in (A) and (B). (D) A three-  
7 dimensional confocal image of GFP signal in (A) and (B) showing the shapes of mutant  
8 clones. The mutant clones located at the apical and basal side of the epithelial layer  
9 were pseudocolored with yellow and magenta respectively. (E) Schematic  
10 representation of tumor phenotypes of *nTSG-Ras<sup>V12</sup>* double mutant cells (green)  
11 observed in wing imaginal epithelia. Mutant clones and wild-type cells are shown in  
12 green and pink respectively. Basement membranes are drawn as a thick red line. (F)  
13 Quantification of pseudopodial protrusions in *scrib-Ras<sup>V12</sup>* mutant clones (the number of  
14 protrusions per mutant clone cluster). Data are mean  $\pm$  s.d. from three independent  
15 experiments. \*\*P<0.001 (unpaired two-tailed Student's *t*-test); (n=18 GFP-expressing  
16 clone clusters from 15 wing discs). (G–H) Wing discs with mosaic mutant clones  
17 coexpressing *lgf<sup>RNAi</sup>* and *Ras<sup>V12</sup>* at the indicated time point after clone induction. Mutant  
18 clones were marked with GFP expression (green) in (G) and RFP expression (red) in  
19 (H). Basement membranes were labeled with anti-Laminin  $\gamma$  antibody (red) in (G) and  
20 Vkg-GFP (green) in (H). Lower panels: vertical sections at a site indicated by a white  
21 line in each upper panel. (I) A three-dimensional confocal image of GFP signal showing  
22 the shapes of mutant clones indicated by a white square in (G). The mutant clones  
23 located at the apical and basal side of the epithelial layer were pseudocolored with  
24 yellow and magenta respectively. (J) Quantification of pseudopodial protrusions in  
25 *lgf<sup>RNAi</sup>-Ras<sup>V12</sup>* mutant clones (the number of protrusions per mutant clone cluster). Data  
26 are mean  $\pm$  s.d. from three independent experiments. \*\*P<0.001 (unpaired two-tailed  
27 Student's *t*-test); (n=19 GFP-expressing clone clusters from 15 wing discs for each  
28 genotype). Nuclei were labeled with DAPI (blue) in (A–C) and (G). Scale bars  
29 represent 50  $\mu$ m. A yellow arrowhead: apically extruded mutant clones. Magenta  
30 arrows: basally extruded mutant clones.

31  
32

1 Figure 2

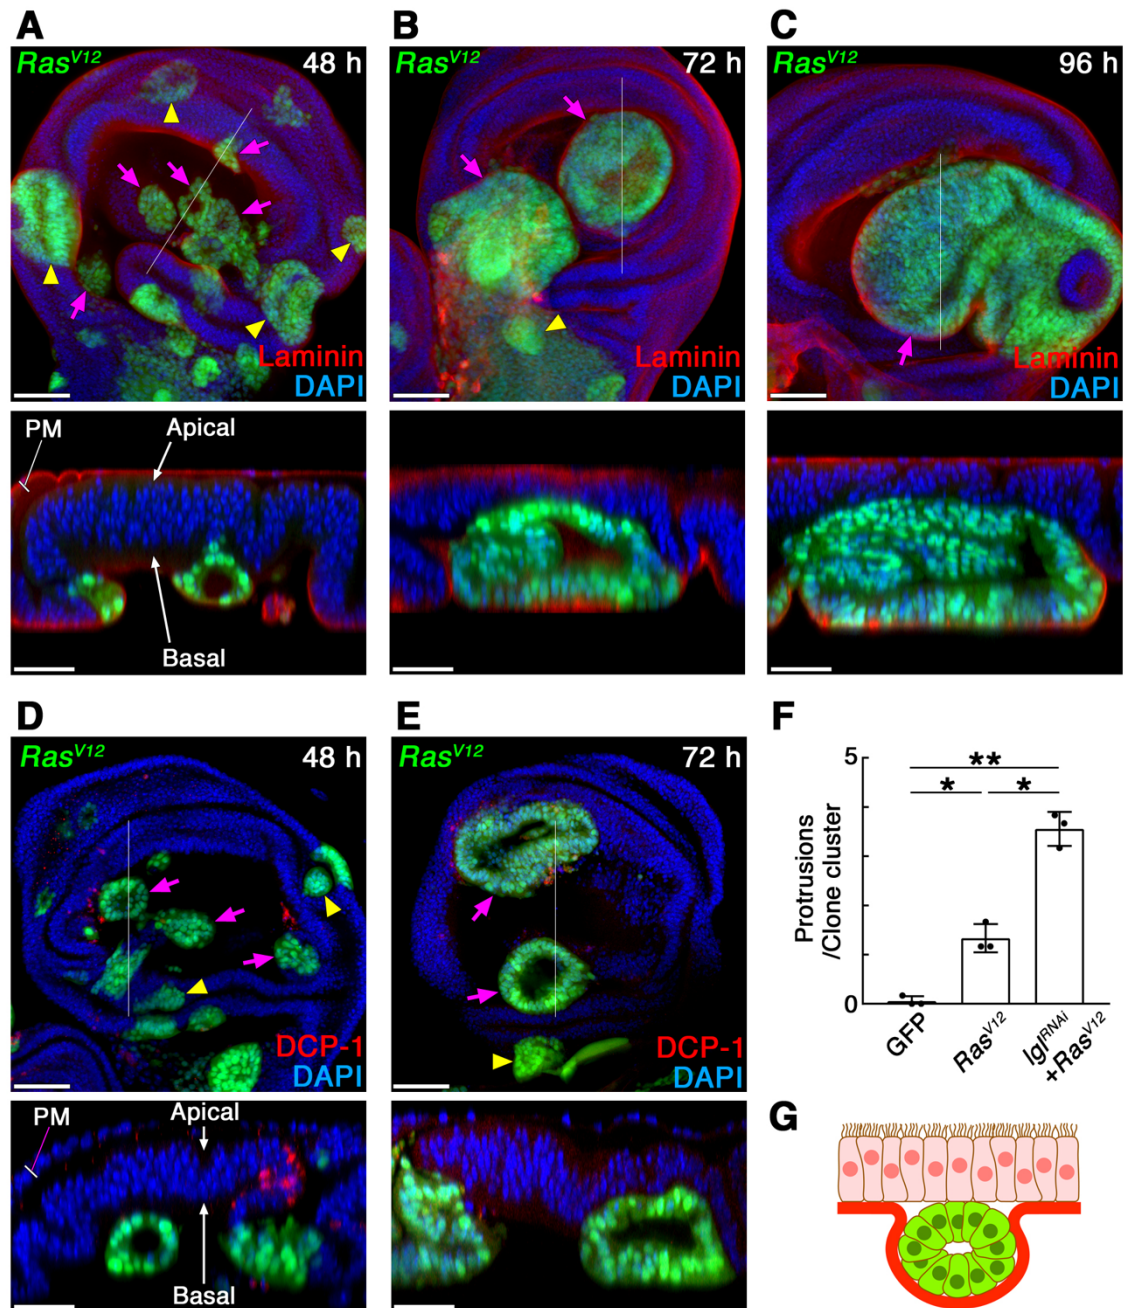

1 **Figure 2.** *Ras<sup>V12</sup>*-expressing cells grow as benign tumors in wing imaginal epithelia.  
2 (A–C) Wing imaginal discs with mosaic mutant clones expressing *Ras<sup>V12</sup>* (labeled by  
3 GFP expression: green) at the indicated time point after clone induction, stained for  
4 Laminin- $\gamma$  (red). The images are z-stack projections of 30 confocal images of the  
5 columnar epithelial layer. Lower panels: vertical sections at a site indicated by a white  
6 line in each upper panel. (D–E) Wing imaginal discs with mosaic mutant clones  
7 expressing *Ras<sup>V12</sup>* (labeled by GFP expression: green) at the indicated time point after  
8 clone induction, stained for cleaved DCP-1 (red). The images are z-stack projections of  
9 30 confocal images of the columnar epithelial layer. Lower panels: vertical sections at a  
10 site indicated by a white line in each upper panel. Nuclei were labeled with DAPI (blue)  
11 in (A–E). Scale bars represent 50  $\mu\text{m}$ . Yellow arrowheads: apically extruded mutant  
12 clones. Magenta arrows: basally extruded mutant clones. PM: peripodial membrane. (F)  
13 Quantification of pseudopodial protrusions in the basally extruded mutant clones (the  
14 number of protrusions per mutant clone cluster). Data are mean  $\pm$  s.d. from three  
15 independent experiments. \* $P < 0.005$ , \*\* $P < 0.001$  (unpaired two-tailed Student's *t*-test);  
16 (n=18 GFP-expressing clone clusters from 15 wing discs for each genotype). (G) A  
17 schematic showing the phenotype of *Ras<sup>V12</sup>*-expressing cells in wing imaginal epithelia.  
18 Mutant clones and wild-type cells are shown in green and pink respectively. Basement  
19 membranes are drawn as a thick red line.

## 2.2. JNK-MMP1 Signaling Is Activated in the Basally Invading *nTSG-Ras<sup>V12</sup>* Tumor Clones

The morphological observations of the *nTSG-Ras<sup>V12</sup>* mosaic clones lead us to reason that those two distinct tumor phenotypes shown by the double-mutant cells are dependent on the location in the epithelial tissue; a benign tumor growth at the apical side, and a malignant invasive phenotype at the basal side of the epithelial layer (Figure 1e). One of the distinctive signs of invasive tumor cells in epithelial tissues is upregulated expression of matrix metalloproteinases (MMPs), endopeptidases which are capable of degrading ECM proteins[38]. *Drosophila* has two MMPs (MMP1 and MMP2), and MMP1 has been shown to be involved in the invasive phenotypes of tumor cells[39]. Immunofluorescence using anti-*Drosophila* MMP1 antibody revealed that the MMP1 expression was strongly upregulated in the *lgl<sup>RNAi</sup>-Ras<sup>V12</sup>* clones localized at the basal side of the epithelial layer (Figure. 3a, b, g). By contrast, the spherical tumor clones growing at the apical side of the epithelial layer did not show strong upregulation of MMP1 expression (Figure. 3a, b, g). In the same experimental condition, the mosaic clones expressing only GFP did not show upregulation of MMP1 expression (Figure S2a, c).

In the context of tumor progression, MMP1 expression is induced by activation of the c-Jun N-terminal kinase (JNK) signaling pathway in *Drosophila* epithelial tissues[39]. Thus, we examined the activity of the JNK signaling pathway in the *nTSG-Ras<sup>V12</sup>* double-mutant clones using TRE-DsRed, a JNK signaling reporter[40]. The TRE-DsRed signals showed us that the JNK activation pattern was exactly similar to the MMP1 expression pattern in the mosaic mutant clones. The signal of TRE-DsRed was strongly upregulated in the *lgl<sup>RNAi</sup>-Ras<sup>V12</sup>* clones localized at the basal side of the epithelial layer, but the signal was weak in these clones localized at the apical side (Figure. 2a, c, h). In the same experimental condition, the mosaic clones expressing only GFP did not show upregulation of the TRE-DsRed signal (Figure S2a, b). These results suggest that JNK-MMP1 signaling are strongly activated when the double-mutant cells are extruded from the basal side of epithelial layers.

## 2.3. JNK-MMP1 Signaling Is Activated by the *nTSG* Defect

The morphological observations of *Ras<sup>V12</sup>*-expressing mosaic clones without an *nTSG* defect showed that these clones do not induce invasive phenotypes in most cases even at the basal side of the epithelial layer (Figure. 2). To corroborate this, we examined the expression patterns of MMP1 and TRE-DsRed in the wing imaginal discs

1 with *Ras*<sup>V12</sup> mosaic clones. Three days after clone induction, neither MMP1 expression  
2 nor TRE-DsRed signals were observed in the *Ras*<sup>V12</sup> clones growing at the apical side of  
3 the epithelial layer (Figure 3d–f). Although a few *Ras*<sup>V12</sup> clones located at the basal side  
4 of the epithelial layer infrequently showed expressions of MMP1 and TRE-DsRed, most  
5 of the clones did not show strong upregulation of these even at the basal side of the  
6 epithelial layers (Figure 3e–h). These results suggest that misexpression of *Ras*<sup>V12</sup> itself  
7 does not induce JNK-MMP1 signaling activation in the epithelial tissues.

8  
9 Then, what does cause JNK activation in the basally invading *nTSG-Ras*<sup>V12</sup>  
10 double-mutant cells? It has been reported that Grindelwald, a *Drosophila* tumor  
11 necrosis factor (TNF) receptor, integrates signals from both TNF and apical polarity  
12 determinants to induce JNK activation in response to perturbation of epithelial  
13 apicobasal polarity[42]. Thus, we asked whether the JNK-MMP1 signaling activation  
14 observed in the *nTSG-Ras*<sup>V12</sup> double mutant tumor cells is caused by the *nTSG* defect-  
15 induced apicobasal polarity disruption. To address this question, we tested JNK-MMP1  
16 signaling activities in the *lgl*<sup>RNAi</sup>-mosaic clones without *Ras*<sup>V12</sup> expression. It has been  
17 previously reported that genetically mosaic clones of *nTSG*-deficient cells, such as *lgl*-  
18 or *scrib*-mutant clones, show apoptosis as the result of cell competition when they are  
19 surrounded by normal cells in epithelial tissues[17]. In the process of cell competition-  
20 induced apoptosis, JNK signaling plays a key role to activate the caspase-signaling  
21 pathway in loser cells[15]. When the *nTSG*-deficient cells are not surrounded by normal  
22 wild-type cells, they can survive, disrupt epithelial tissue organization, and show  
23 tumorigenic overgrowth. JNK signaling has also been shown to be involved in the  
24 process of apicobasal polarity defect-induced tumorigenesis[42].

25  
26 We have previously shown that *lgl*<sup>RNAi</sup>-mosaic clones without *Ras*<sup>V12</sup> expression  
27 showed apoptosis and were extruded toward the basal side of the epithelial layer[33]. To  
28 analyze the tumor phenotypes induced by an *nTSG* defect and the JNK signaling  
29 activity in its process, we kept the *lgl*<sup>RNAi</sup>-mosaic clones alive by blocking their  
30 apoptosis with a co-expression of *p35*, an anti-apoptotic gene of baculovirus. Three  
31 days after mosaic clone induction, a subset of the clones co-expressing *lgl*<sup>RNAi</sup> and *p35*  
32 (*lgl*<sup>RNAi</sup>-*p35* clones) were localized at the basal side of the epithelial layer and show mild  
33 proliferation (Figure. 4a). Although the basement membrane surrounding these *lgl*<sup>RNAi</sup>-  
34 *p35* clones was partially degraded, these clones did not show pseudopodial protrusions  
35 (Figure. 4a, b). Four days after clone induction, most of the *lgl*<sup>RNAi</sup>-*p35* clones were  
36 localized at the basal side of the epithelial layer, and we found that both JNK activity

1 and MMP1 expression were upregulated in these basally extruded clones (Figure 4e–l).  
2 These basally extruded clones, however, did not frequently show pseudopodial  
3 protrusions (Figure. 4b, g, k). Although we found that the apically extruded *lg<sup>RNAi</sup>-p35*  
4 clones showed weak expression of TRE-DsRed, MMP1 expression was hardly observed  
5 in these apical clones (Figure 4c, h, j). These results suggest that activation of the JNK-  
6 MMP1 signaling is induced by an *nTSG* defect but is not enough to induce the invasion  
7 phenotypes such as pseudopodial protrusions observed in the *nTSG-Ras<sup>V12</sup>* double  
8 mutant cells (Figure 4d).  
9  
10

1 Figure 3

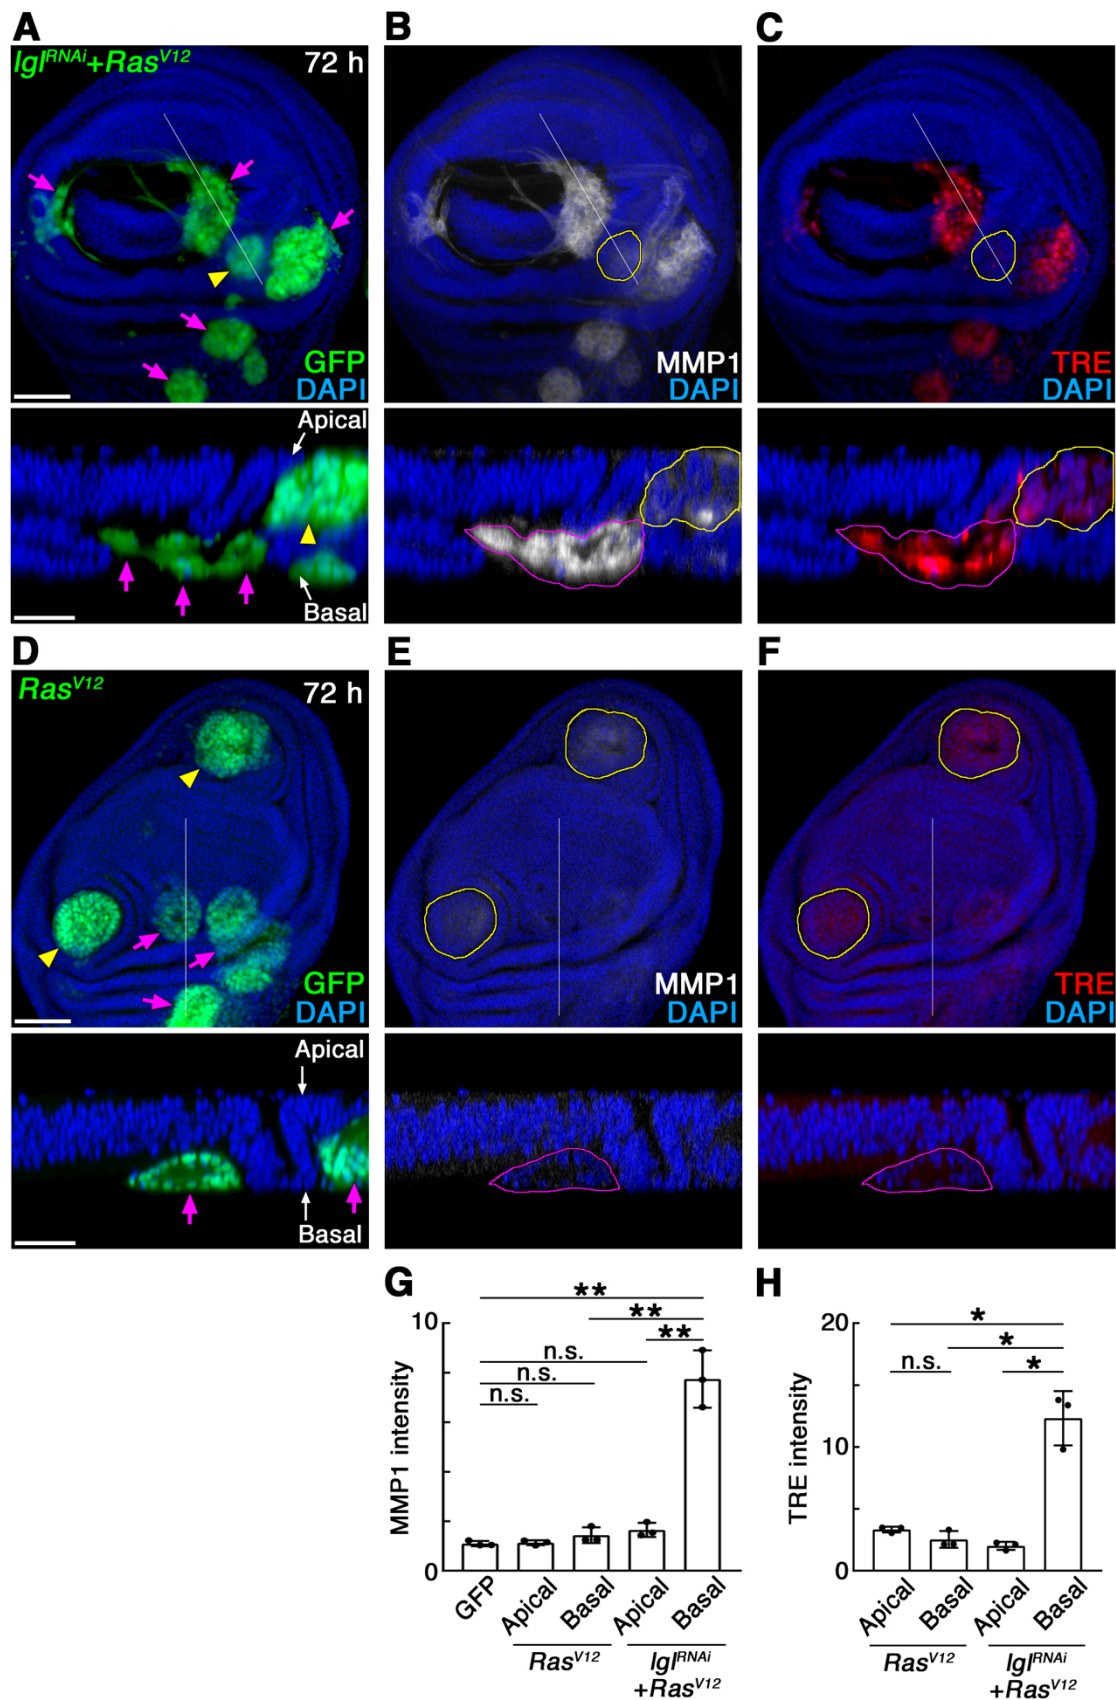

1 **Figure 3.** JNK-MMP1 signaling is activated in the basally invading *lgl<sup>RNAi</sup>-Ras<sup>V12</sup>* tumor  
2 clones. (A–C) A wing imaginal disc with mosaic mutant clones expressing *lgl<sup>RNAi</sup>* and  
3 *Ras<sup>V12</sup>* 72 hours after clone induction. The mutant clones are labeled by GFP expression  
4 (green) in (A). (B) MMP1 expression detected by anti-MMP1 antibody staining (white)  
5 in the mosaic wing disc in (A). (C) JNK activation detected by TRE-DsRed in the  
6 mosaic wing disc in (A). The images are z-stack projections of 30 confocal images of  
7 the columnar epithelial layer. Lower panels: vertical sections at a site indicated by a  
8 white line in each upper panel. (D–F) Wing imaginal discs with mosaic mutant clones  
9 expressing *Ras<sup>V12</sup>* 72 hours after clone induction. The mutant clones are labeled by GFP  
10 expression (green) in (D). (E) MMP1 expression detected by anti-MMP1 antibody  
11 staining (white) in the mosaic wing disc in (D). (F) JNK activation detected by TRE-  
12 DsRed in the mosaic wing disc in (D). Apically or basally extruded clones are circled  
13 by yellow or magenta lines respectively in (B, C, E, F). The images are z-stack  
14 projections of 30 confocal images of the columnar epithelial layer. Lower panels:  
15 vertical sections at a site indicated by a white line in each upper panel. Nuclei were  
16 labeled with DAPI (blue) in (A–F). Scale bars represent 50  $\mu$ m. Yellow arrowheads:  
17 apically extruded mutant clones. Magenta arrows: basally extruded mutant clones.  
18 (G–H) Quantification for signal intensities of anti-MMP1 antibody staining (G) or  
19 TRE-DsRed (H). Values are expressed as a ratio relative to control (GFP-negative  
20 areas). Data are mean  $\pm$  s.d. from three independent experiments. \*P<0.005, \*\*P<0.001  
21 (unpaired two-tailed Student's *t*-test); n=90 selected areas of 25-square pixels (for  
22 MMP1) or 225-square pixels (for TRE-DsRed) from GFP-positive clone regions.  
23



1 Figure 4

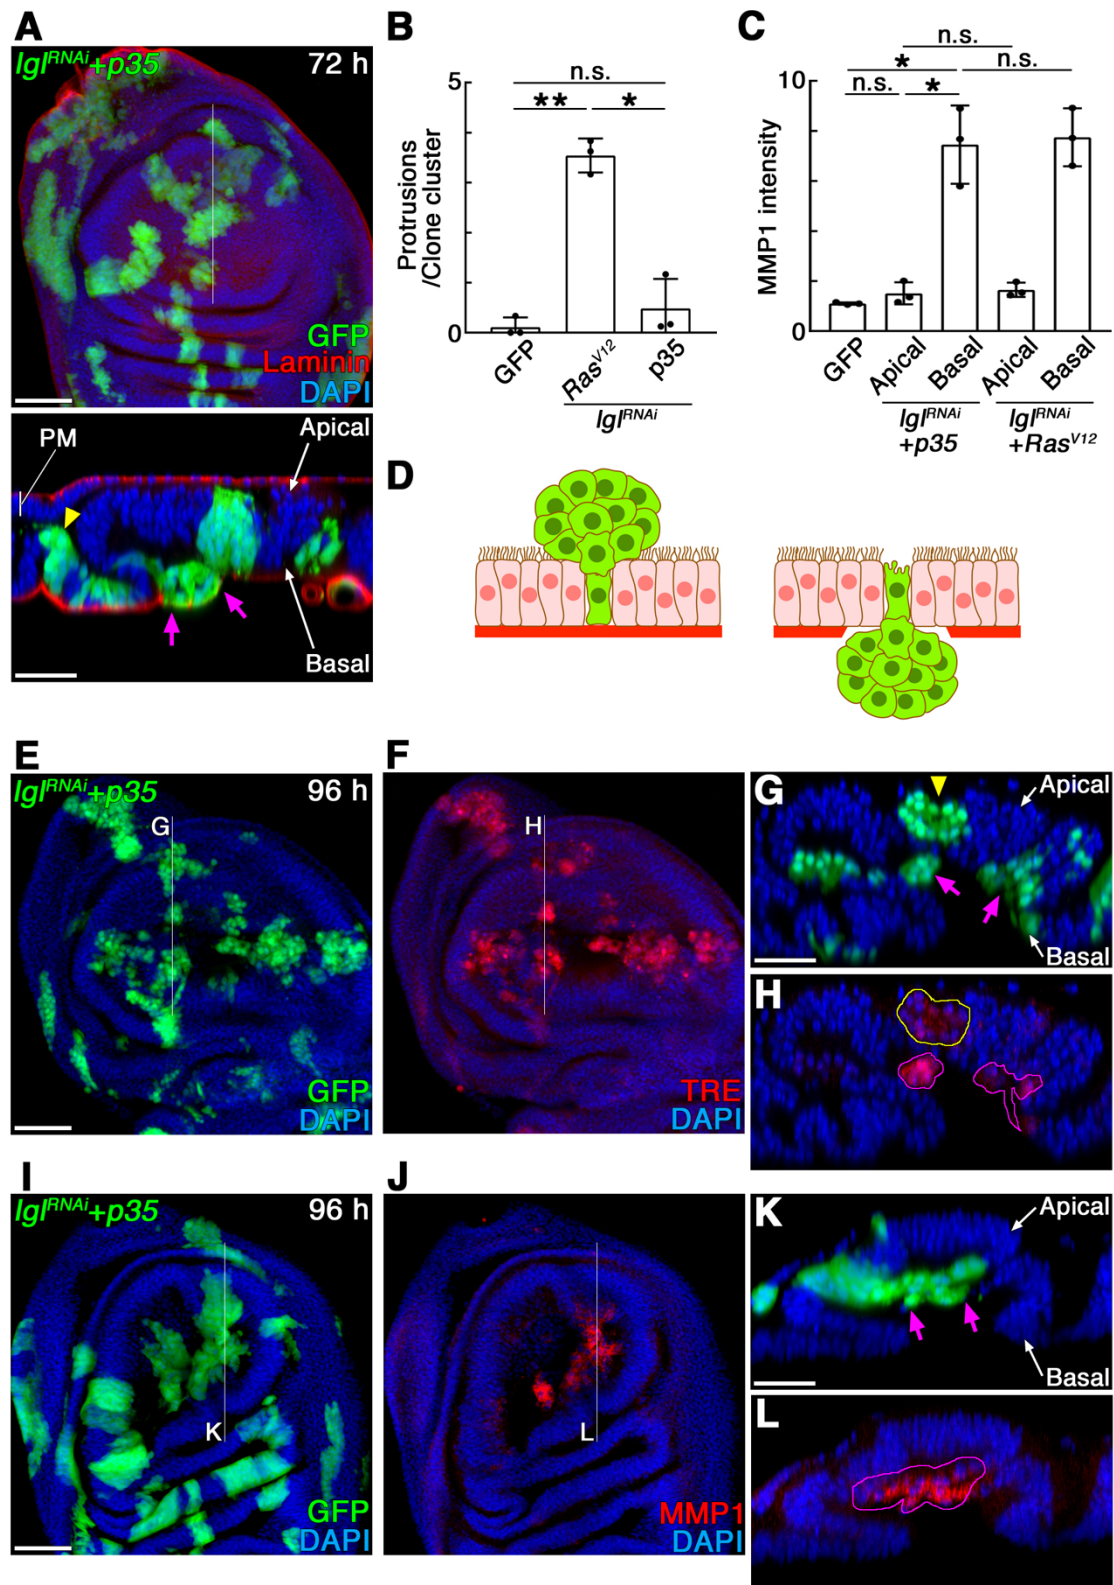

1 **Figure 4.** *lgl<sup>RNAi</sup>-p35* clones induce basal extrusion and JNK-MMP1 activation but not  
2 invasive behaviors. (A) A wing imaginal disc with mosaic mutant clones expressing  
3 *lgl<sup>RNAi</sup>* and *p35* (labeled by GFP expression: green) 72 hours after clone induction,  
4 stained for Laminin- $\gamma$  (red). The images are z-stack projections of 30 confocal images of  
5 the columnar epithelial layer. Lower panel: a vertical section at a site indicated by a  
6 white line in the upper panel. PM: peripodial membrane. (B) Quantification of  
7 pseudopodial protrusions in the basally extruded mutant clones (the number of  
8 protrusions per mutant clone cluster). Data are mean  $\pm$  s.d. from three independent  
9 experiments. \*P<0.005, \*\*P<0.001 (unpaired two-tailed Student's *t*-test); (n=20 GFP-  
10 expressing clone clusters from 15 wing discs for each genotype). (C) Quantification for  
11 signal intensities of anti-MMP1 antibody staining. Values are expressed as a ratio  
12 relative to control (GFP-negative areas). Data are mean  $\pm$  s.d. from three independent  
13 experiments. \*P<0.005 (unpaired two-tailed Student's *t*-test); n=90 selected areas of 25-  
14 square pixels from GFP-positive clone regions. (D) Schematics showing the phenotypes  
15 of *lgl<sup>RNAi</sup>-p35* clones in wing imaginal epithelia. Left: apically extruded clones. Right:  
16 basally extruded clones. Mutant clones and wild-type cells are shown in green and pink  
17 respectively. Basement membranes are drawn as a thick red line. (E) Wing imaginal  
18 discs with mosaic mutant clones expressing *lgl<sup>RNAi</sup>* and *p35* 96 hours after clone  
19 induction. The mutant clones were labeled by GFP expression (green). (F) JNK  
20 activation detected by TRE-DsRed in the mosaic wing disc in (E). (G–H) A vertical  
21 section at a site indicated by a white line in (E–F). (I) Wing imaginal discs with mosaic  
22 mutant clones expressing *lgl<sup>RNAi</sup>* and *p35* 96 hours after clone induction. The mutant  
23 clones were labeled by GFP expression (green). (J) MMP1 expression detected by anti-  
24 MMP1 antibody staining (red) in the mosaic wing disc in (I). The images are z-stack  
25 projections of 30 confocal images of the columnar epithelial layer. (K–L) A vertical  
26 section at a site indicated by a white line in (I–J). Nuclei were labeled with DAPI (blue)  
27 in (A) and (E–L). A yellow arrowhead and circle: apically extruded mutant clones.  
28 Magenta arrows and circles: basally extruded mutant clones. Scale bars represent 50  
29  $\mu$ m.  
30

#### 1 2.4. JNK Activation Is Involved in the Extrusion of *nTSG*-Deficient Cells

2 To gain further insight into the role of the JNK signaling pathway in the invasive  
3 phenotype of *nTSG-Ras<sup>V12</sup>* mutant cells, we suppressed JNK activity in the *lgl<sup>RNAi</sup>-*  
4 *Ras<sup>V12</sup>* double mutant clones. When a dominant-negative form of *basket* (*Drosophila*  
5 JNK), *bsk<sup>DN</sup>*, was co-expressed in the *lgl<sup>RNAi</sup>-Ras<sup>V12</sup>* mosaic clones, they proliferated in  
6 the epithelial layer, induced curvature of the epithelial layer, but did not show  
7 extrusions even three days after clone induction (Figure 5a). We also confirmed that  
8 MMP1 expression was suppressed in these clones (Figure 5b). When we suppressed the  
9 function of MMP1 in the *lgl<sup>RNAi</sup>-Ras<sup>V12</sup>* mosaic clones by co-expression of *Drosophila*  
10 Tissue inhibitor of metalloproteinases, Timp, however, *lgl<sup>RNAi</sup>-Ras<sup>V12</sup>* clones showed  
11 basal extrusion at three days after clone induction (Figure 5c). Although the basement  
12 membrane under the growing mutant clones was partially degraded, these clones were  
13 localized between the basal side of the epithelial layer and the basement membrane and  
14 did not show pseudopodial protrusions (Figure 5c, e, f). This result indicates that MMP1  
15 is not involved in the basal extrusion. Based on these data, we reasoned that JNK  
16 activation promotes two independent downstream events: basal extrusion of *nTSG-*  
17 *Ras<sup>V12</sup>* clones[43] and MMP1 expression-induced basement membrane degradation[39].  
18 The mechanism of the JNK-dependent extrusion of *nTSG* mutant cells has been shown  
19 in *Drosophila* eye imaginal discs; the signaling of Slit ligand, its transmembrane  
20 Roundabout receptor Robo2, and the downstream cytoskeletal effector Enabled/VASP  
21 (Ena) exert a force downstream of JNK to induce delamination of *scrib* mutant cells  
22 from epithelial layers[43]. As we demonstrated above, however, the *Ras<sup>V12</sup>*-expressing  
23 clones without an *nTSG* defect underwent basal extrusion as a cell cluster without JNK  
24 activation (Figure. 3f). Therefore, the cell-cluster extrusion of *Ras<sup>V12</sup>* clones is not  
25 dependent on the JNK-signaling activity but might be induced by defective epithelial  
26 morphogenesis[41].

27  
28

1 **Figure 5**

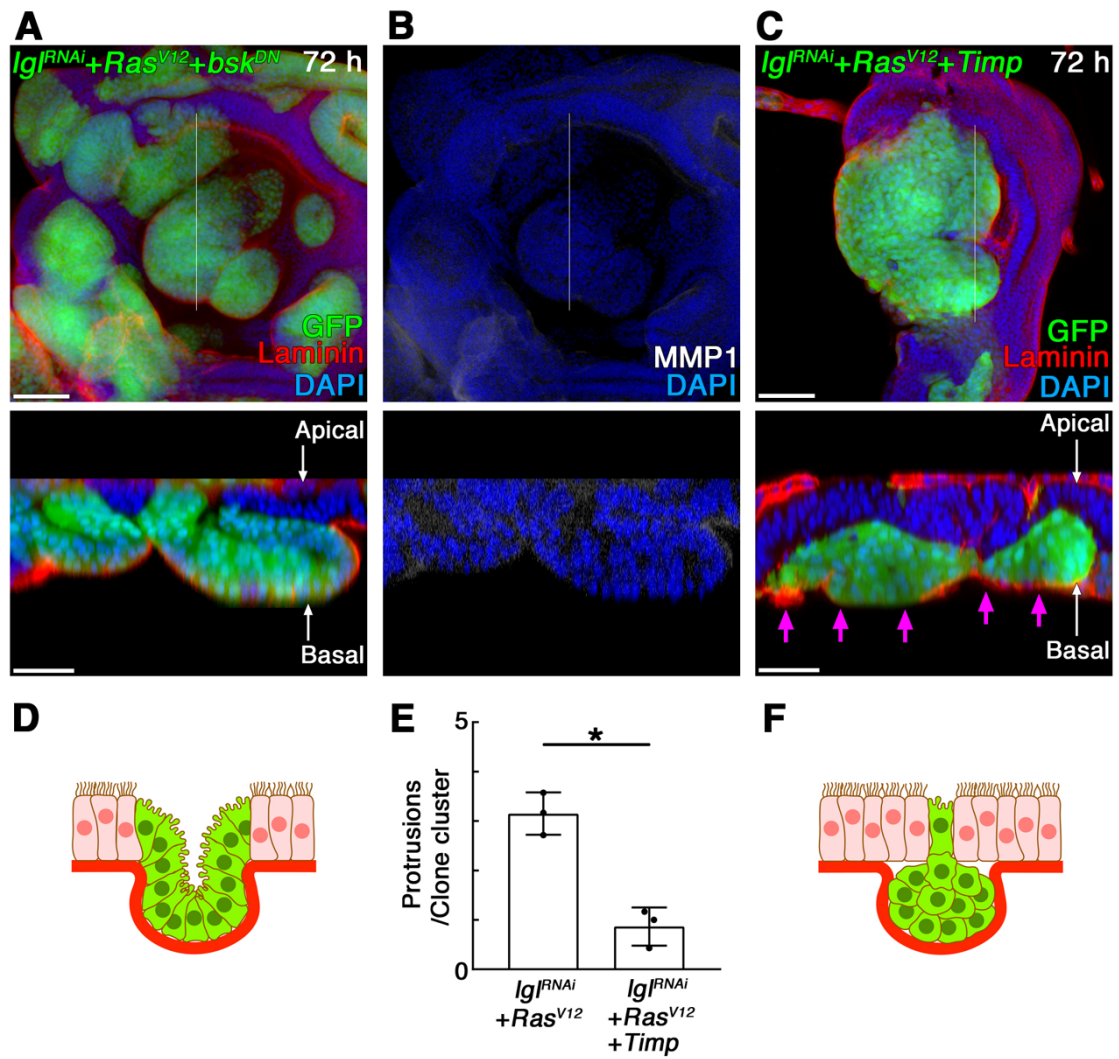

1 **Figure 5.** JNK activation but not MMP1 is involved in the basal extrusion of *lgl<sup>RNAi</sup>-*  
2 *Ras<sup>V12</sup>* clones. **(A)** A wing imaginal disc with mosaic mutant clones expressing *lgl<sup>RNAi</sup>,*  
3 *Ras<sup>V12</sup>,* and *bsk<sup>DN</sup>* (labeled by GFP expression: green) 72 hours after clone induction,  
4 stained for Laminin- $\gamma$  (red). **(B)** MMP1 expression detected by anti-MMP1 antibody  
5 staining (white) in the mosaic wing disc in **(A)**. **(C)** A wing imaginal disc with mosaic  
6 mutant clones expressing *lgl<sup>RNAi</sup>,* *Ras<sup>V12</sup>,* and *Timp* (labeled by GFP expression: green)  
7 72 hours after clone induction, stained for Laminin- $\gamma$  (red). The images of the upper  
8 panels are z-stack projections of 30 confocal images of the columnar epithelial layer.  
9 Lower panel: a vertical section at a site indicated by a white line in each upper panel.  
10 Magenta arrows indicate basally translocated mutant clones. Nuclei were labeled with  
11 DAPI (blue) in **(A–C)**. Scale bars represent 50  $\mu$ m. **(D)** A schematic showing the  
12 phenotypes of *lgl<sup>RNAi</sup>-Ras<sup>V12</sup>-bsk<sup>DN</sup>* clones in wing imaginal epithelia. Mutant clones and  
13 wild-type cells are shown in green and pink respectively. Basement membranes are  
14 drawn as a thick red line. **(E)** Quantification of pseudopodial protrusions in the basally  
15 extruded mutant clones (the number of protrusions per mutant clone cluster). Data are  
16 mean  $\pm$  s.d. from three independent experiments. \* $P < 0.005$  (unpaired two-tailed  
17 Student's *t*-test); (n=20 GFP-expressing clone clusters from 15 wing discs for each  
18 genotype). **(F)** A schematic showing the phenotypes of *lgl<sup>RNAi</sup>-Ras<sup>V12</sup>-Timp* clones in  
19 wing imaginal epithelia. Mutant clones and wild-type cells are shown in green and pink  
20 respectively. Basement membranes are drawn as a thick red line.  
21

## 2.5. Epithelial Cell Polarity is Intrinsically Compromised at The Invasion Hotspots

As we demonstrated above, the *lgl<sup>RNAi</sup>-p35* clones without *Ras<sup>V12</sup>* expression do not show invasive phenotypes, whereas they activate the JNK-MMP1 signaling and are basally extruded (Figure. 4). Also, the *lgl<sup>RNAi</sup>-Ras<sup>V12</sup>* clones expressing Timp basally translocate, stay between the basal side of the epithelial layer and the basement membrane, but do not show invasive phenotypes (Figure. 5). Similarly, most of the *Ras<sup>V12</sup>*-expressing clones without an *nTSG* defect neither activate JNK nor show invasive phenotypes even at the basal side of epithelial layers (Figure 3). Taking all these data together we hypothesized that both *Ras<sup>V12</sup>* expression and JNK activation are required for the onset of invasive phenotypes and two independent processes lead to the tumor invasion: 1) the JNK activation caused by an apicobasal polarity defect induces basal extrusion of tumor cells and MMP1 upregulation-mediated basement membrane degradation, and 2) oncogenic Ras and the JNK activation cooperatively provoke invasive behaviors of tumor cells at the extracellular matrix.

One of our observations that contradicts this hypothesis is that a few *Ras<sup>V12</sup>*-expressing clones show an upregulation of JNK-MMP1 signaling and invasive phenotypes at the basal side of epithelial layers albeit infrequently (Figure 6a, b). Interestingly, we realized that the infrequent basal invasion phenotypes of *Ras<sup>V12</sup>*-expressing clones were almost always observed at a few specific areas in the wing imaginal epithelia. A quantification for this localized pattern of the basal invasion of *Ras<sup>V12</sup>*-expressing clones revealed that, surprisingly, over 80% of basal invasions were derived from four specific areas located in the hinge region (area number 2, 6, 7, 8 in Figure 6e). Moreover, we found that the basally extruded MMP1-positive *lgl<sup>RNAi</sup>-Ras<sup>V12</sup>* clones were also derived from these specific areas at the almost same ratio (Figure 6c–e). We, therefore, termed these areas “invasion hotspots.” Among these invasion hotspots in the wing imaginal discs, the occurrence ratio of basal invasion phenotypes was relatively high at the presumptive unnamed plate (or humeral plate) area[44] (area number 7 in Figure 6e) in the dorsal hinge region and at the presumptive axillary pouch (or pleural sclerite) area[44] (area number 2 in Figure 6e) in the ventral hinge region.

We presumed that these invasion hotspots have some differences from other regions in intrinsic tissue structures or local genetic signaling activities. One of the apparent differences we found in these spots is a disturbed pattern of planar-polarized cellular arrangement visible from the basal side of the epithelial layer (Figure 7a). This cellular arrangement pattern was visualized by an anti-tubulin antibody staining, and the

1 invasion hotspot was recognized as a disturbance of the flow-like pattern of  
2 microtubules (Figure 7a–e). Furthermore, we found that the subcellular localization  
3 patterns of adherens junction proteins and cytoskeletal proteins were altered in these  
4 invasion hotspots. Immunofluorescences with anti-E-cadherin and anti-Armadillo  
5 (*Drosophila*  $\beta$ -catenin) antibodies showed that both proteins were localized not only at  
6 the apical side but also at the basal-lateral side of epithelial cells in the invasion hotspots  
7 (Figure 7h, j, m, o), whereas the adherens junction normally localized to the apical-  
8 lateral membrane (Figure 7g, i, l, n). In addition, the subcellular localization patterns of  
9 the actin cytoskeleton (F-actin) and  $\alpha$ -Spectrin (a subunit of the spectrin cytoskeleton)  
10 were shifted from the apical to the basal side in the invasion hotspots (Figure 7p–y).  
11 These observations suggest that the epithelial apicobasal polarity is intrinsically  
12 compromised in the cells of invasion hotspots albeit mildly and that the spots are  
13 susceptible to stimuli which disturb epithelial organization such as oncogenic mutations.  
14  
15

1 Figure 6

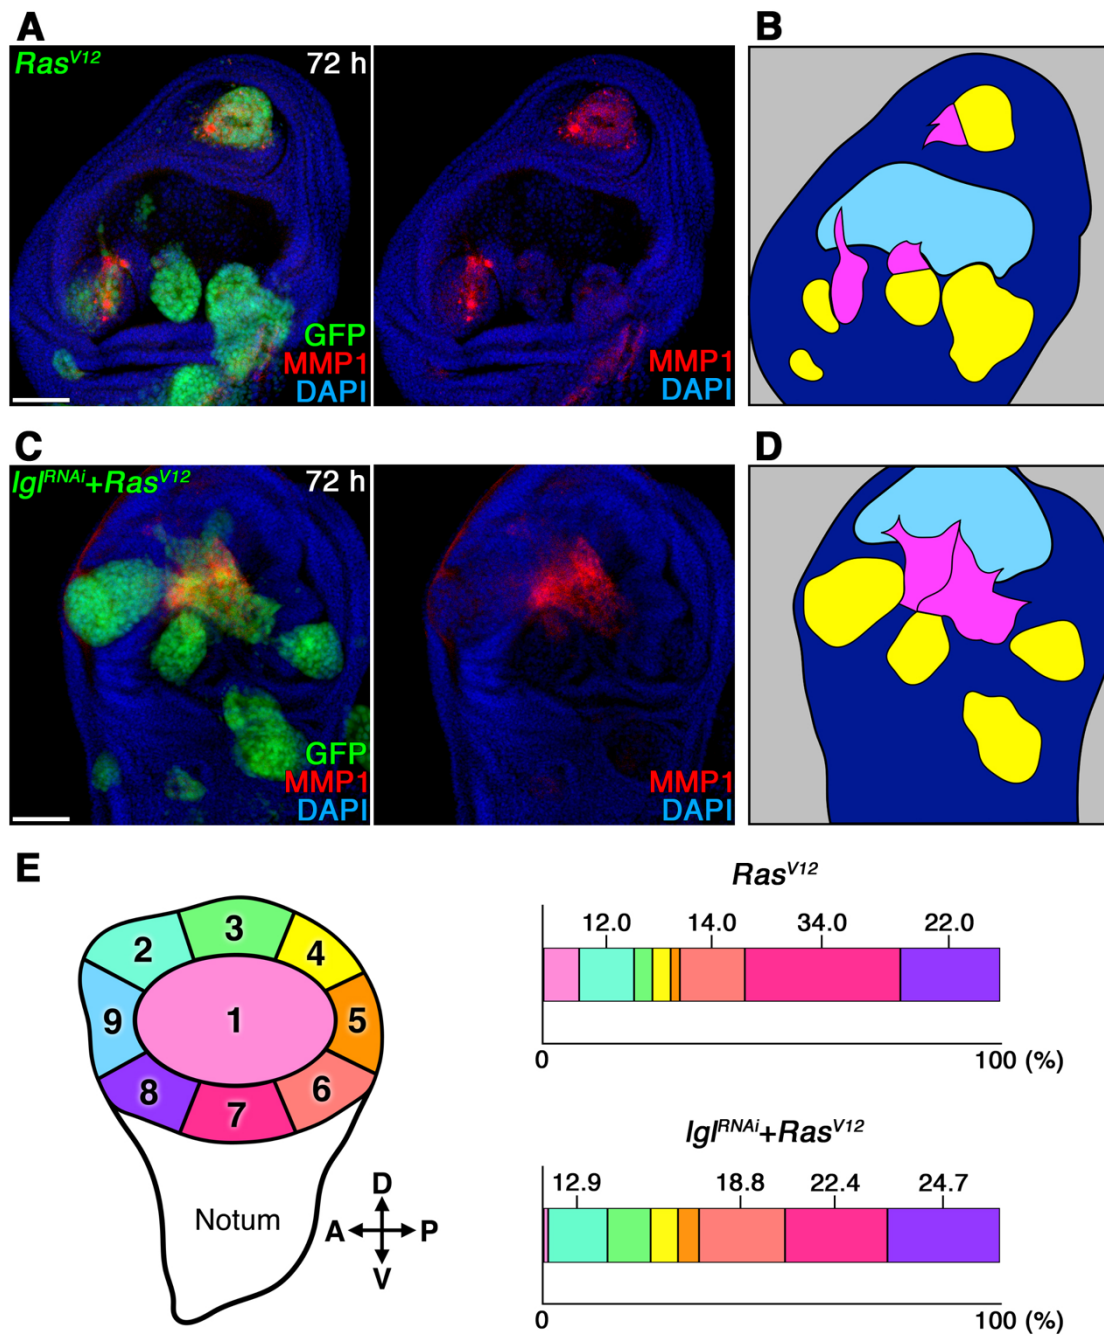



1 **Figure 6.** *Ras<sup>V12</sup>*-expressing clones show basal invasion phenotypes at the specific spots  
2 in wing disc epithelia. (A) A wing imaginal disc with mosaic mutant clones expressing  
3 *Ras<sup>V12</sup>* (labeled by GFP expression: green) 72 hours after clone induction, stained for  
4 MMP1 (red). The right panel shows the MMP1 expression pattern (red) in the left  
5 panel. (B) A line drawing traces the tumor clones located at the apical side (yellow) and  
6 basal side (magenta) of the wing disc epithelia shown in (A). The wing pouch area is  
7 shown in light blue. (C) A wing imaginal disc with mosaic mutant clones expressing  
8 *lgl<sup>RNAi</sup>* and *Ras<sup>V12</sup>* (labeled by GFP expression: green) 72 hours after clone induction,  
9 stained for MMP1 (red). The right panel shows the MMP1 expression pattern (red) in  
10 the left panel. (D) A line drawing traces the tumor clones located at the apical side  
11 (yellow) and basal side (magenta) of the wing disc epithelia shown in (C). The wing  
12 pouch area is shown in light blue. (E) Quantification of locational occurrence ratio of  
13 basal invasion (basally extruded mutant clones with pseudopodial protrusions) induced  
14 by *Ras<sup>V12</sup>*- or *lgl<sup>RNAi</sup>-Ras<sup>V12</sup>* mosaic clones in wing disc epithelia. n=50 GFP-expressing  
15 clone clusters from 73 wing discs for *Ras<sup>V12</sup>*-clones or n=85 GFP-expressing clone  
16 clusters from 54 wing discs for *lgl<sup>RNAi</sup>-Ras<sup>V12</sup>* clones.  
17

1 **Figure 7**

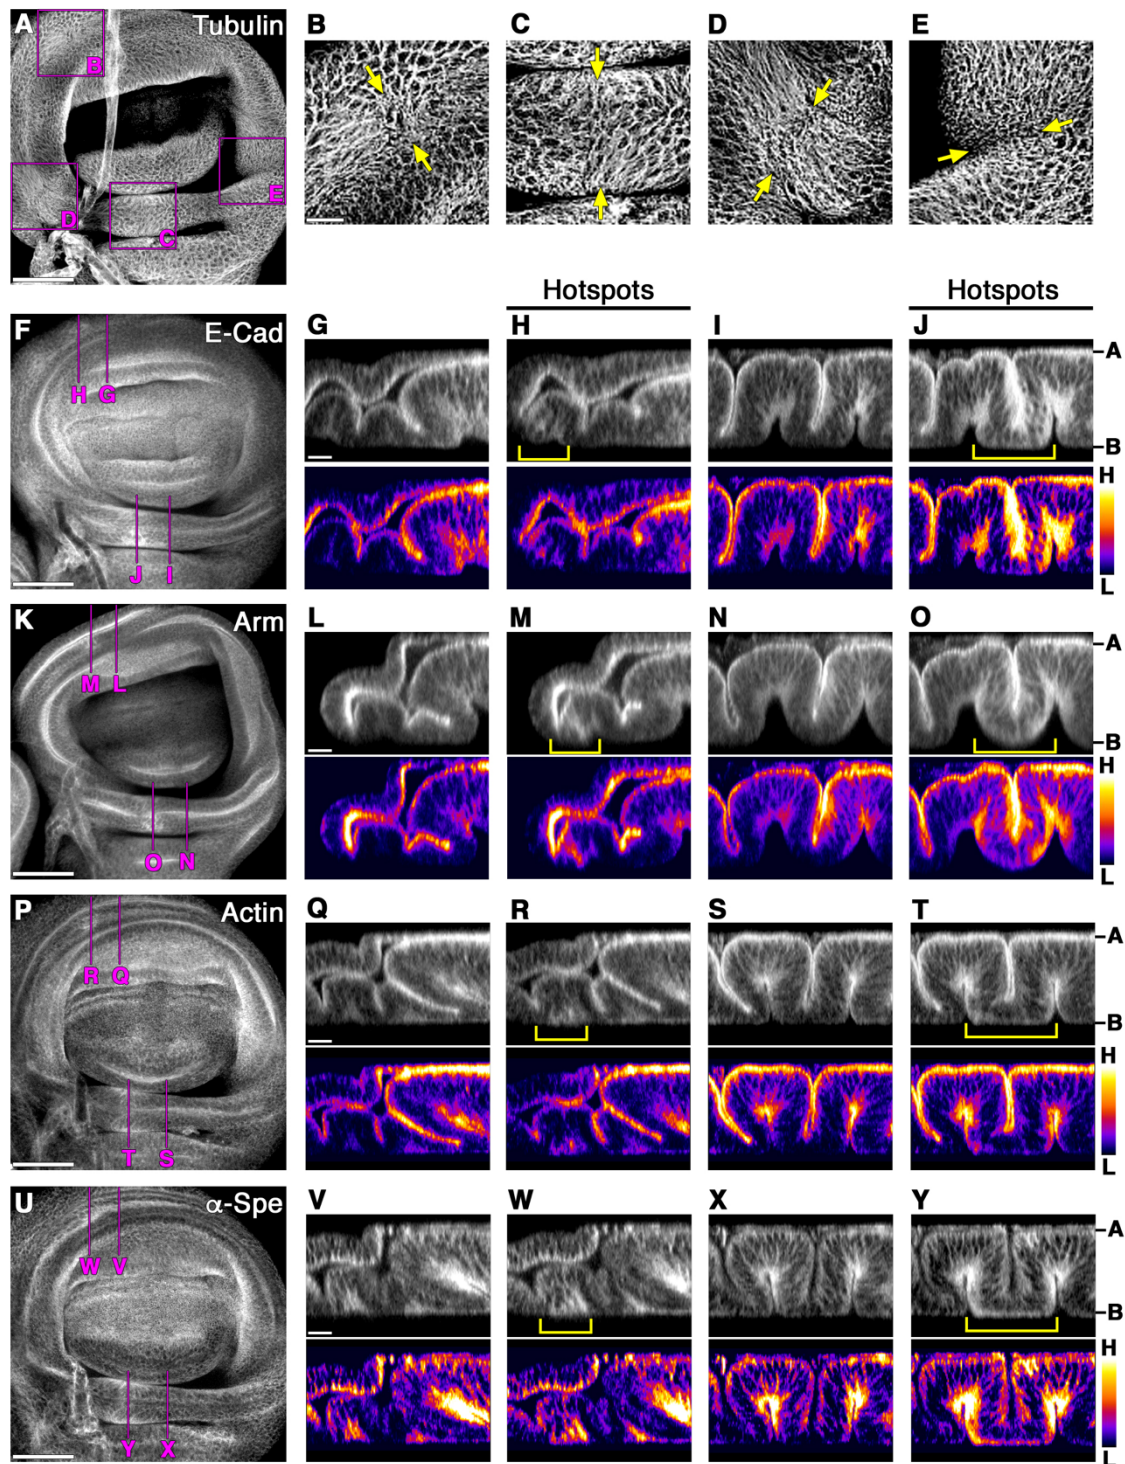

1 **Figure 7.** Epithelial cell polarity is intrinsically compromised at the invasion hotspots.  
2 (A) A wild-type wing disc stained for  $\alpha$ -tubulin (white). (B–E) Magnifications of the  
3 boxes indicated in (A). Yellow arrows indicate the invasion hotspots. (F) A wild-type  
4 wing disc stained for E-Cadherin (white). (G–J) Vertical sections at sites indicated by  
5 magenta lines in (F). Lower panels: Signal intensities of each upper panel image. (K) A  
6 wild-type wing disc stained for Armadillo (white). (L–O) Vertical sections at sites  
7 indicated by magenta lines in (K). Lower panels: Signal intensities of each upper panel  
8 image. (P) A wild-type wing disc stained for F-actin (white). (Q–T) Vertical sections at  
9 sites indicated by magenta lines in (P). Lower panels: Signal intensities of each upper  
10 panel image. (U) A wild-type wing disc stained for  $\alpha$ -Spectrin (white). (V–Y) Vertical  
11 sections at sites indicated by magenta lines in (U). Lower panels: Signal intensities of  
12 each upper panel image. The images in (A, F, K, P, U) are z-stack projections of 30  
13 confocal images of the basal side of the columnar epithelial layer. Yellow brackets show  
14 invasion hotspots in (H, J, M, O, R, T, W, Y). Scale bars represent 50  $\mu\text{m}$  in (A, F, K,  
15 P, U) and 10  $\mu\text{m}$  in (B, G, L, Q, V). A: apical. B: basal. H: high. L: low.  
16

## 1 2.6. *Ras<sup>V12</sup>* Expression Induces Basal Invasion Specifically at The Invasion Hotspots

2 To examine whether *Ras<sup>V12</sup>*-expression induces invasive phenotypes specifically  
3 at the invasion hotspots, we used a Gal4-driver line, *GMRI7G12-Gal4*, that expresses  
4 Gal4 specifically in the entire medial fold of the dorsal hinge area during larval  
5 development (Figure 8a–c). When *Ras<sup>V12</sup>*-misexpression was induced by *GMRI7G12-*  
6 *Gal4*, basal invasions and pseudopodial protrusions were observed specifically at the  
7 invasion hotspots (Figure 8d–f). We also found that the MMP1 expression was  
8 specifically upregulated in the invasive cells protruded from these spots (Figure 8g–i).  
9 When only RFP expression was induced in the dorsal hinge area with *GMRI7G12-*  
10 *Gal4*, neither tumor phenotypes nor MMP1 upregulation was observed (Figure S3a–c).  
11 These results lead us to conclude that *Ras<sup>V12</sup>*-expression induces basal invasion  
12 specifically at the invasion hotspots in the epithelial tissues. When *lgl<sup>RNAi</sup>-Ras<sup>V12</sup>* double  
13 mutant was induced in the entire medial fold using *GMRI7G12-Gal4*, the JNK-MMP1  
14 activation was observed at the invasion hotspot before the basal invasion occurred  
15 (Figure S3d–f). Subsequently, *lgl<sup>RNAi</sup>-Ras<sup>V12</sup>* double mutant cells in this area showed  
16 basal invasion and intensive pseudopodial protrusions from the invasion hotspots  
17 (Figure 8j–l). Collectively, these data suggest that *Ras<sup>V12</sup>*-expression cooperating with  
18 the JNK signaling which is prone to be activated at the invasion hotspots provoke  
19 invasive phenotypes in the wing imaginal epithelia.

20

1 Figure 8

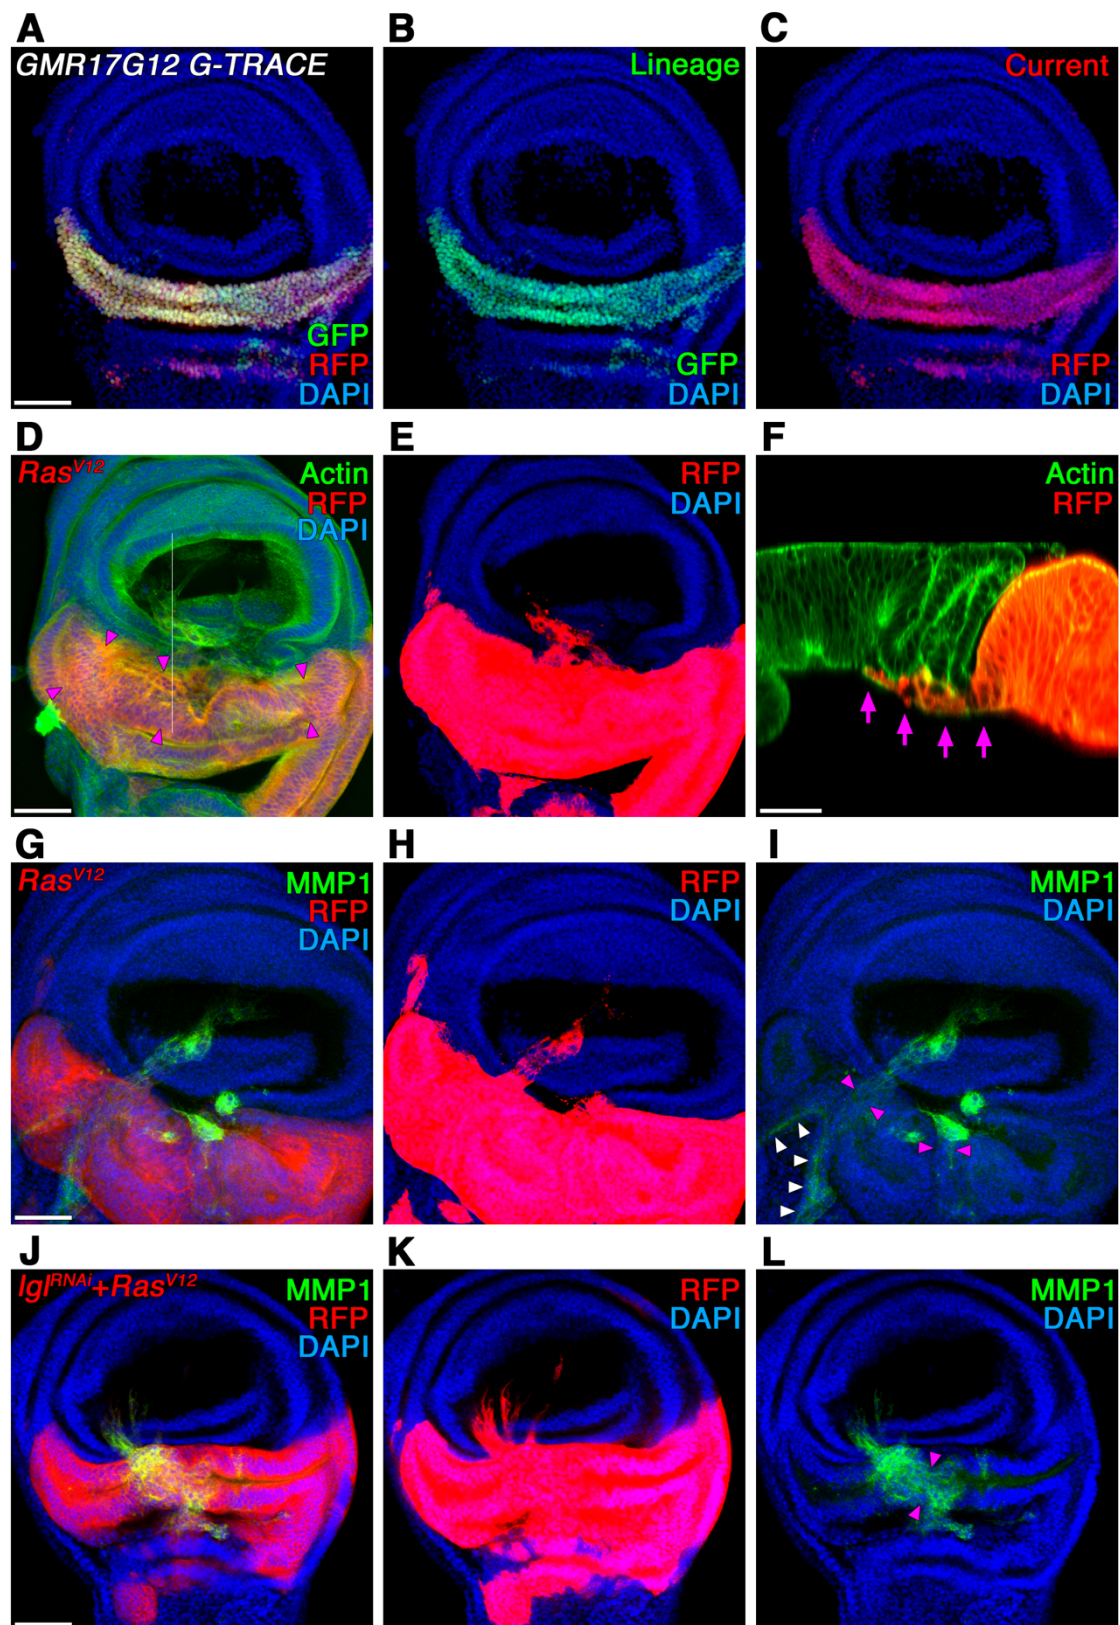

1 **Figure 8.** *Ras<sup>V12</sup>* expression induces basal invasion specifically at the invasion hotspots  
2 in the wing imaginal epithelia. (A–C) A wing imaginal disc showing G-TRACE  
3 analysis with *GMR17G12-Gal4*. Lineage-traced GFP expression (B) and current RFP-  
4 expression (C) are merged in (A). (D) A wing imaginal disc with *GMR17G12-Gal4*-  
5 driven *Ras<sup>V12</sup>* expression in the dorsal hinge region stained for F-actin (green).  
6 *GMR17G12-Gal4* expressing regions were labeled by RFP (red). (E) The fluorescent  
7 intensity of the RFP signal in (D) was increased to visualize pseudopodial protrusions.  
8 (F) A vertical section at a site indicated by a white line in (D). Magenta arrows indicate  
9 basal invasion of *Ras<sup>V12</sup>*-expressing cells. (G) A wing imaginal disc with *GMR17G12*-  
10 *Gal4*-driven *Ras<sup>V12</sup>* expression in the dorsal hinge region stained for MMP1 (green).  
11 *GMR17G12-Gal4* expressing regions were labeled by RFP (red). (H) The fluorescent  
12 intensity of the RFP signal in (G) was increased to visualize pseudopodial protrusions.  
13 (I) MMP1 expression pattern (green) in the wing disc in (G). White arrowheads indicate  
14 endogenous MMP1 expression in the trachea. (J) A wing imaginal disc with  
15 *GMR17G12-Gal4*-driven *lgl<sup>RNAi</sup>* and *Ras<sup>V12</sup>* expression in the dorsal hinge region  
16 stained for MMP1 (green). *GMR17G12-Gal4* expressing regions were labeled by RFP  
17 (red). (K) The fluorescent intensity of the RFP signal in (J) was increased to visualize  
18 pseudopodial protrusions. (L) MMP1 expression pattern (green) in the wing disc in (J).  
19 Magenta arrowheads indicate invasion hotspots in (D), (I), and (L). Nuclei were labeled  
20 with DAPI (blue) in (A–E) and (G–L). Scale bars represent 50  $\mu\text{m}$ .  
21

### 1 3. Discussion

2  
3 This study describes how a combinatorial mutation of an *nTSG* defect and the  
4 oncogenic Ras activation induces tumor invasion *in vivo* using *Drosophila* wing  
5 imaginal epithelia as an experimental model. Although the invasive tumor phenotypes  
6 of *nTSG-Ras<sup>V12</sup>* double mutant cells have been previously described in different  
7 systems[15,26,32,34,35], our data show that their tumor phenotypes, benign tumor  
8 growth or malignant invasive phenotypes, are highly dependent on a tissue-intrinsic  
9 microenvironment. On the one hand, the *nTSG-Ras<sup>V12</sup>* double mutant cells develop into  
10 benign tumors when they are extruded from the apical side of the epithelial layer. On  
11 the other, they become invasive when they are extruded from the basal side. Our data  
12 suggest that the invasion phenotypes of *nTSG-Ras<sup>V12</sup>* double mutant clones are  
13 implemented by the combination of three independent processes: JNK activation-  
14 induced basal extrusion, MMP1-mediated basement membrane degradation, and  
15 activation of invasive cellular behaviors by oncogenic Ras at the ECM. One of the  
16 questions unanswered in this study is why the *lgl<sup>RNAi</sup>-Ras<sup>V12</sup>* double mutant cells do not  
17 induce JNK-MMP1 signaling activation and invasive phenotypes at the apical side of  
18 the epithelial layer. Based on our data, we can speculate that an environmental factor  
19 has a key role in determining the tumor phenotypes. In fact, tumor cell invasion is  
20 regarded as an adaptive process mediated by the interactions with stromal components,  
21 including ECM, fibroblasts, endothelial cells, and macrophages at the basal side of the  
22 epithelial layer[7,45,46]. Conversely, when tumor cells are extruded into the lumen  
23 from the apical side of the epithelial layer, they do not have interactions with those  
24 stromal components. In *Drosophila* imaginal discs, hemocytes are recruited to the sites  
25 where basement membranes are degraded and have an interaction with tumor cells[47–  
26 49]. Therefore, tumor cells, after penetrating the basement membrane, encounter a  
27 stromal component, supposedly ECM and hemocytes in *Drosophila* imaginal discs,  
28 which may further enhance JNK-MMP signaling and provoke invasive behaviors.

29  
30 We previously reported that *nTSG*-deficient cells (without *Ras<sup>V12</sup>* expression)  
31 extruded from the apical side of the epithelium begin tumorigenic overgrowth at the  
32 tumor hotspots in wing imaginal discs, whereas those cells extruded toward the basal  
33 side at the tumor coldspots undergo apoptosis[33]. It has been well documented that  
34 oncogenic Ras has a decremental effect on the apoptosis pathways whereby it  
35 contributes to the survival of cancer cells[50,51]. Mechanistically, oncogenic Ras  
36 activates the PI3K-Akt and Raf-MAPK signaling pathways that lead to downregulation

1 of proapoptotic mediators or upregulation of anti-apoptotic genes[51]. These anti-  
2 apoptotic functions of oncogenic Ras help the *Ig<sup>RNAi</sup>-Ras<sup>V12</sup>* double mutant cells survive  
3 even when they are extruded from the basal side of epithelial layers. Our data also show  
4 that the *Ig<sup>RNAi</sup>-p35* clones (without *Ras<sup>V12</sup>* expression) do not induce invasive  
5 phenotypes, whereas they activate the JNK-MMP1 signaling and are basally extruded.  
6 Besides the prosurvival signalings such as PI3K-Akt and Raf-MAPK pathways, Ras  
7 activates Rho GTPases which play a key role in alterations of cell adhesion and cell  
8 motility[51]. Collectively, all these data indicate that the oncogenic Ras-induced  
9 alterations of multiple signaling activities are required for the onset of the invasive  
10 phenotypes of *nTSG-Ras<sup>V12</sup>* double mutant cells.

11  
12 In this study, however, we also show that *Ras<sup>V12</sup>*-expressing clones without an  
13 *nTSG* defect do not show invasive phenotypes except in the setting of those clones at  
14 the invasive hotspots. Thus, although oncogenic Ras activates genetic signaling  
15 pathways that promote invasive phenotypes, another factor should be required for the  
16 onset of the tumor invasion. Our data show that the factor is the JNK signaling, and this  
17 is consistent with previous reports showing functional cooperation of oncogenic Ras  
18 and JNK activation in cancer progression[15,39,52]. In the previous reports, *Ras<sup>V12</sup>*  
19 expression in combination with a mutant of *nTSG* or overactivation of JNK was used to  
20 induce invasion phenotypes in the epithelial tissues. In contrast, we showed that *Ras<sup>V12</sup>*  
21 expression alone can induce invasive phenotypes at a few invasive hotspots where the  
22 epithelial organization is intrinsically compromised. Our data suggest that the intrinsic  
23 mild polarity disturbance predisposes the invasion hotspot cells to activate JNK  
24 signaling by an oncogenic stimulus such as *Ras<sup>V12</sup>* expression and that oncogenic Ras  
25 and the JNK activation cooperatively provoke invasive behaviors of tumor cells.

26  
27 Another key unanswered question is about physiological aspects of the invasion  
28 hotspots and how the spots are formed in epithelial development. The fate map of the  
29 *Drosophila* wing imaginal disc based on an elaborate implantation experiment [44]  
30 helps us to determine the developmental fate of each spot in the third instar wing discs.  
31 According to the fate map, one invasion hotspot located in the ventral hinge region is  
32 the presumptive axillary pouch (or pleural sclerite) and another one in the dorsal hinge  
33 region is the presumptive unnamed plate (or humeral plate). We still do not understand  
34 why these spots intrinsically have a disturbance of cellular arrangement patterns and a  
35 mildly compromised apicobasal organization. One plausible explanation is that those  
36 spots are mechanically distorted during morphological transformations to form a small



1 node structure such as axillary pouch or pleural sclerite of the wing hinges. In the  
2 morphogenesis of complicated structures, developing tissues experience physical  
3 distortions to a varying degree[53]. Those mechanical distortions of cell shape, cellular  
4 membranes, cytoskeletons, or ECM, in some cases, play a key role in the control of  
5 morphogenesis, differentiation, and proliferation through mechanotransduction[54].  
6

7       The invasion hotspots we identified in the wing imaginal epithelia are formed as  
8 small local spots (smaller than 10 cells in diameter) with some structural distortions.  
9 Given the conservation of epithelial cell/tissue structures in flies and mammals, it is  
10 likely that a substantial number of structurally similar spots exist in human epithelial  
11 tissues. It is also possible that tumor cells may utilize additionally occurring mutations  
12 to distort tissue structures similar to the invasion hotspots by themselves during tumor  
13 progression[11]. Future studies to identify the developmental processes by which  
14 invasion hotspots form in various types of tissues or to clarify the behaviors of different  
15 types of tumor cells in invasion hotspots will lead to a better understanding of tumor  
16 invasion mechanisms.  
17

## 1 4. Materials and Methods

2

### 3 4.1. Fly Stocks and Genetics

4 *Drosophila* stocks were maintained by standard methods at 25°C. All fly crosses  
5 were carried out at 25°C according to standard procedures. For the generation of  
6 genetically mosaic clones, the heat-shock-activated flip-out-Gal4-UAS system[37] or  
7 mosaic analysis with a repressible cell marker (MARCM) system[36] was used. To  
8 obtain genetically mosaic mutant clones in imaginal discs, first instar larvae (48 h after  
9 egg deposition) were heat-shocked for 30-120 min at 37°C. After heat shock, larvae  
10 were maintained at 25°C until dissection of imaginal discs. To induce misexpression of  
11 *Ras<sup>V12</sup>* or *lgl<sup>RNAi</sup>* and *Ras<sup>V12</sup>* at the dorsal hinge region of the wing imaginal discs,  
12 *GMR17G12-Gal4* was used. The wing discs were dissected 7 days after egg deposition  
13 at 29 °C. The following fly strains were used: *scrib<sup>1</sup>*[55], *UAS-Ras<sup>V12</sup>* (BDSC #64196),  
14 *UAS-lgl-RNAi* (VDRC #51247), *UAS-Dcr-2* (BDSC #24651), *TRE-DsRed* (BDSC  
15 #59011), *UAS-bsk<sup>DN</sup>* (BDSC #9311), *UAS-timp* (BDSC #58708), *UAS-p35* (BDSC  
16 #5072, 5073), *GMR17G12-Gal4* (FlyLight #R17G12), *UAS-mCD8.mRFP* (BDSC  
17 #27399), *UAS-RedStinger*, *UAS-FLP*, *Ubi-p63E(FRT.STOP)Stinger* (BDSC #28281),  
18 *Vkg-GFP* (a gift from Dr. Sa Kan Yoo).

19

### 20 4.2. Detailed Genotypes for Each Experiment

#### 21 **Figure 1**

22 (A–D, F), *hsFLP; UAS-Ras<sup>V12</sup>/act-Gal4, UAS-GFP; FRT82B scrib<sup>1</sup>/FRT82B tubP-*  
23 *Gal80*

24 (G, I), *hsFLP; UAS-Ras<sup>V12</sup>/+; act>CD2>Gal4, UAS-GFP/UAS-lgl-RNAi, UAS-dicer2*

25 (H), *hsFLP; Vkg-GFP/UAS-Ras<sup>V12</sup>; act>CD2>Gal4, UAS-RFP/UAS-lgl-RNAi, UAS-*  
26 *dicer2*

27 (J), *hsFLP;; act>CD2>Gal4, UAS-GFP/+*

28 *hsFLP; UAS-Ras<sup>V12</sup>/+; act>CD2>Gal4, UAS-GFP/UAS-lgl-RNAi, UAS-dicer2*

29

#### 30 **Figure 2**

31 (A–E), *hsFLP; UAS-Ras<sup>V12</sup>/+; act>CD2>Gal4, UAS-GFP/+*

32 (F), *hsFLP;; act>CD2>Gal4, UAS-GFP/+*

33 *hsFLP; UAS-Ras<sup>V12</sup>/+; act>CD2>Gal4, UAS-GFP/+*

34 *hsFLP; UAS-Ras<sup>V12</sup>/+; act>CD2>Gal4, UAS-GFP/UAS-lgl-RNAi, UAS-dicer2*

35

#### 36 **Figure 3**

1 (A–C), *hsFLP; UAS-Ras<sup>V12</sup>/TRE-DsRed; act>CD2>Gal4, UAS-GFP/UAS-lgl-RNAi,*  
2 *UAS-dicer2*  
3 (D–F), *hsFLP; UAS-Ras<sup>V12</sup>/TRE-DsRed; act>CD2>Gal4, UAS-GFP/+*  
4 (G–H), *hsFLP; TRE-DsRed/+; act>CD2>Gal4, UAS-GFP/+*  
5 *hsFLP; UAS-Ras<sup>V12</sup>/TRE-DsRed; act>CD2>Gal4, UAS-GFP/+*  
6 *hsFLP; UAS-Ras<sup>V12</sup>/TRE-DsRed; act>CD2>Gal4, UAS-GFP/UAS-lgl-RNAi, UAS-*  
7 *dicer2*

8

#### 9 **Figure 4**

10 (A), *hsFLP; act>CD2>Gal4, UAS-GFP/+; UAS-lgl-RNAi, UAS-dicer2/UAS-p35*  
11 (B–C), *hsFLP;; act>CD2>Gal4, UAS-GFP/+*  
12 *hsFLP; act>CD2>Gal4, UAS-GFP/+; UAS-lgl-RNAi, UAS-dicer2/UAS-p35*  
13 *hsFLP; UAS-Ras<sup>V12</sup>/+; act>CD2>Gal4, UAS-GFP/UAS-lgl-RNAi, UAS-dicer2*  
14 (E–H), *hsFLP; UAS-p35/TRE-DsRed; UAS-lgl-RNAi, UAS-dicer2/act>CD2>Gal4,*  
15 *UAS-GFP*  
16 (I–L), *hsFLP; act>CD2>Gal4, UAS-GFP/+; UAS-lgl-RNAi, UAS-dicer2/UAS-p35*

17

#### 18 **Figure 5**

19 (A–B), *hsFLP; act>CD2>Gal4, UAS-GFP/UAS-Ras<sup>V12</sup>; UAS-lgl-RNAi, UAS-*  
20 *dicer2/UAS-bsk<sup>DN</sup>*  
21 (C), *hsFLP; act>CD2>Gal4, UAS-GFP/UAS-Ras<sup>V12</sup>; UAS-lgl-RNAi, UAS-dicer2/UAS-*  
22 *timp*  
23 (E), *hsFLP; UAS-Ras<sup>V12</sup>/+; act>CD2>Gal4, UAS-GFP/UAS-lgl-RNAi, UAS-dicer2*  
24 *hsFLP; act>CD2>Gal4, UAS-GFP/UAS-Ras<sup>V12</sup>; UAS-lgl-RNAi, UAS-dicer2/UAS-timp*

25

#### 26 **Figure 6**

27 (A), *hsFLP; UAS-Ras<sup>V12</sup>/+; act>CD2>Gal4, UAS-GFP/+*  
28 (C), *hsFLP; UAS-Ras<sup>V12</sup>/+; act>CD2>Gal4, UAS-GFP/UAS-lgl-RNAi, UAS-dicer2*  
29 (E), *hsFLP; UAS-Ras<sup>V12</sup>/+; act>CD2>Gal4, UAS-GFP/+*  
30 *hsFLP; UAS-Ras<sup>V12</sup>/+; act>CD2>Gal4, UAS-GFP/UAS-lgl-RNAi, UAS-dicer2*

31

#### 32 **Figure 7**

33 *w<sup>1118</sup>*

34

#### 35 **Figure 8**

1 (A–C), *w*;; *GMR17G12-Gal4/UAS-RedStinger, UAS-FLP, Ubi-*  
2 *p63E(FRT.STOP)Stinger*

3 (D–I), *w*; *UAS-Ras<sup>V12/+</sup>; GMR17G12-Gal4, UAS-mCD8.mRFP/+*

4 (J–L), *w*; *UAS-Ras<sup>V12/+</sup>; GMR17G12-Gal4, UAS-mCD8.mRFP/UAS-lgl-RNAi, UAS-*  
5 *dicer2*

6

### 7 **Figure S1**

8 (A–C), *hsFLP; UAS-Ras<sup>V12/+</sup>; act>CD2>Gal4, UAS-GFP/UAS-lgl-RNAi, UAS-dicer2*

9 (D–F), *hsFLP;; act>CD2>Gal4, UAS-GFP/+*

10

### 11 **Figure S2**

12 (A–C), *hsFLP; TRE-DsRed/+; act>CD2>Gal4, UAS-GFP/+*

13

### 14 **Figure S3**

15 (A–C), *w*;; *GMR17G12-Gal4, UAS-mCD8.mRFP/+*

16 (D–F), *w*; *UAS-Ras<sup>V12/+</sup>; GMR17G12-Gal4, UAS-mCD8.mRFP/UAS-lgl-RNAi, UAS-*  
17 *dicer2*

18

### 19 **4.3. Immunohistochemistry and Image Analysis**

20 For analyses of genetically mosaic clones in *Drosophila* imaginal discs, larvae  
21 were chosen at the given time after clone induction, and dissected tissues were fixed in  
22 4% formaldehyde at room temperature for 15 min. All subsequent steps for  
23 immunostaining were performed according to standard procedures for confocal  
24 microscopy[10]. The following antibodies were used: rabbit anti-cleaved *Drosophila*  
25 Dcp-1 (#9578) (1:100, Cell Signaling Technology), mouse anti-Armadillo N2 7A1  
26 (1:40, Developmental Studies Hybridoma Bank [DSHB]), rat anti-DE-Cadherin  
27 DCAD2 (1:30, DSHB), mouse anti-MMP1 (1:1:1 mixture of 3B8, 3A6 and 5H7 were  
28 diluted 1:10, DSHB), mouse anti- $\alpha$ -Spectrin 3A9 (1:50, DSHB), mouse anti- $\alpha$ -Tubulin  
29 AA4.4 (1:100, DSHB), and rabbit anti-Laminin- $\gamma$  (1:100, abcam). Alexa Fluor 488,  
30 546, and 633 (1:400, Molecular Probes) were used for secondary antibodies. F-actin  
31 was stained by Alexa Fluor 488 and 546 Phalloidin (1:50, Molecular Probes). All  
32 samples were counterstained with DAPI (Sigma-Aldrich) for visualization of DNA.  
33 Immunofluorescence images were captured on the Olympus FV1000 or FV1200  
34 confocal microscopes and analyzed with ImageJ. 3-D reconstructions of confocal z-  
35 stack images were rendered with ImageJ 3-D Viewer, an ImageJ plugin (B. Schmid,

1 2007). Signal intensities were plotted with Interactive 3-D Surface Plot, an ImageJ  
2 plugin (K.U. Barthel, 2004).

3

#### 4 *4.4. Quantification of pseudopodial protrusions*

5 We defined cellular processes which project more than 5  $\mu\text{m}$  from cell bodies as  
6 pseudopodial protrusions. The number of pseudopodial protrusions per mutant clone  
7 cluster (consisting of more than ten GFP-positive cells) were counted from five wing  
8 discs in each independent experiment for each genotype.

9

#### 10 *4.5. Quantification for fluorescent signal intensities*

11 Signal intensities of TRE-DsRed or anti-MMP1 antibody staining were measured  
12 from confocal images with ImageJ. Each value of signal intensity was measured as an  
13 average intensity of a selected area of 225-square pixels (for TRE-DsRed) or 25-square  
14 pixels (excluding nuclei for MMP1) from GFP-positive clone areas and calculated as a  
15 ratio relative to control (GFP-negative areas).

16

#### 17 *4.6. Statistical Analysis*

18 For data analyses, a two-tailed unpaired Student's *t*-test was used to determine P-  
19 values. P-values less than 0.005 were considered to be significant. No statistical method  
20 was used to predetermine sample size.

21

1 **Author Contributions:** Conceptualization, Y.F. and Y.T.; Methodology, Y.T.;  
2 Validation, R.K., H.T., S.D., Y.F. and Y.T.; Formal Analysis, R.K., H.T., S.D., and  
3 Y.T.; Investigation, R.K., H.T., S.D., and Y.T.; Resources, Y.F. and Y.T.; Data  
4 Curation, R.K., H.T., S.D., Y.F., and Y.T.; Writing – Original Draft Preparation,  
5 Y.T.; Writing – Review & Editing, R.K., H.T., S.D., Y.F., and Y.T.; Funding  
6 Acquisition, Y.T.

7

8 **Funding:** This work was supported by Japan Society for the Promotion of Science  
9 (JSPS) Fostering Joint International Research (B) 18KK0234 (Y.T.), the Suhara Kinen  
10 Foundation, ISHIZUE 2020 of Kyoto University Research Development Program.

11

12 **Acknowledgments:** We thank SK. Yoo, T. Igaki, the Vienna Drosophila RNAi Center,  
13 and the Bloomington Drosophila Stock Center for providing fly stocks.

14

15 **Conflicts of Interest:** The authors declare no conflicts of interest.

16

1 **References**

2

3 1. Hanahan, D.; Weinberg, R.A. Hallmarks of Cancer: The next Generation. *Cell* **2011**,  
4 *144*, 646–674, doi:10.1016/j.cell.2011.02.013.

5 2. Casás-Selves, M.; DeGregori, J. How Cancer Shapes Evolution and How Evolution  
6 Shapes Cancer. *Evol Educ Outreach* **2011**, *4*, 624–634, doi:10.1007/s12052-011-0373-  
7 y.

8 3. Tamori, Y. The Initial Stage of Tumorigenesis in Drosophila Epithelial Tissues. *Adv*  
9 *Exp Med Biol* **2019**, *1167*, 87–103, doi:10.1007/978-3-030-23629-8\_5.

10 4. Novikov, N.M.; Zolotaryova, S.Y.; Gautreau, A.M.; Denisov, E.V. Mutational  
11 Drivers of Cancer Cell Migration and Invasion. *British journal of cancer* **2020**, 1–13,  
12 doi:10.1038/s41416-020-01149-0.

13 5. Sahai, E. Mechanisms of Cancer Cell Invasion. *Current opinion in genetics &*  
14 *development* **2005**, *15*, 87–96, doi:10.1016/j.gde.2004.12.002.

15 6. Lambert, A.W.; Pattabiraman, D.R.; Weinberg, R.A. Emerging Biological Principles  
16 of Metastasis. *Cell* **2017**, *168*, 670–691, doi:10.1016/j.cell.2016.11.037.

17 7. Friedl, P.; Alexander, S. Cancer Invasion and the Microenvironment: Plasticity and  
18 Reciprocity. *Cell* **2011**, *147*, 992–1009, doi:10.1016/j.cell.2011.11.016.

19 8. Krakhmal, N.V.; Zavyalova, M.V.; Denisov, E.V.; Vtorushin, S.V.; Perelmuter, V.M.  
20 Cancer Invasion: Patterns and Mechanisms. *Acta naturae* **2015**, *7*, 17–28,  
21 doi:10.5402/2012/381428.

22 9. Miles, W.O.; Dyson, N.J.; Walker, J.A. Modeling tumor invasion and metastasis in  
23 Drosophila. *Disease Models and Mechanisms* **2011**, *4*, 753–761,  
24 doi:10.1242/dmm.006908.

25 10. Morimoto, K.; Tamori, Y. Induction and Diagnosis of Tumors in  
26 *Drosophila* Imaginal Disc Epithelia. *Journal of Visualized Experiments*  
27 **2017**, doi:10.3791/55901.

- 1 11. Tamori, Y.; Deng, W.-M. Tissue-Intrinsic Tumor Hotspots: Terroir for  
2 Tumorigenesis. *TRENDS in CANCER* **2017**, *3*, 259–268,  
3 doi:10.1016/j.trecan.2017.03.003.
- 4 12. Tamori, Y.; Deng, W.-M. Cell Competition and Its Implications for Development  
5 and Cancer. *Journal of Genetics and Genomics* **2011**, *38*, 483–495,  
6 doi:10.1016/j.jgg.2011.09.006.
- 7 13. Baker, N.E. Emerging Mechanisms of Cell Competition. *Nature Reviews Genetics*  
8 **2020**, 1–15, doi:10.1038/s41576-020-0262-8.
- 9 14. Morata, G. Cell Competition: A Historical Perspective. *Dev Biol* **2021**, *476*, 33–40,  
10 doi:10.1016/j.ydbio.2021.02.012.
- 11 15. Igaki, T.; Pagliarini, R.A.; Xu, T. Loss of Cell Polarity Drives Tumor Growth and  
12 Invasion through JNK Activation in *Drosophila*. *Current Biology* **2006**, *16*, 1139–1146,  
13 doi:10.1016/j.cub.2006.04.042.
- 14 16. Igaki, T.; Pastor-Pareja, J.C.; Aonuma, H.; Miura, M.; Xu, T. Intrinsic tumor  
15 suppression and epithelial maintenance by endocytic activation of Eiger/TNF signaling  
16 in *Drosophila*. *Developmental Cell* **2009**, *16*, 458–465,  
17 doi:10.1016/j.devcel.2009.01.002.
- 18 17. Tamori, Y.; Bialucha, C.U.; Tian, A.-G.; Kajita, M.; Huang, Y.-C.; Norman, M.;  
19 Harrison, N.; Poulton, J.; Ivanovitch, K.; Disch, L.; et al. Involvement of Lgl and  
20 Mahjong/VprBP in cell competition. *PLoS biology* **2010**, *8*, e1000422,  
21 doi:10.1371/journal.pbio.1000422.
- 22 18. Menéndez, J.; Pérez-Garijo, A.; Calleja, M.; Morata, G. A tumor-suppressing  
23 mechanism in *Drosophila* involving cell competition and the Hippo pathway.  
24 *Proceedings of the National Academy of Sciences of the United States of America* **2010**,  
25 *107*, 14651–14656, doi:10.1073/pnas.1009376107.
- 26 19. Norman, M.; Wisniewska, K.A.; Lawrenson, K.; Garcia-Miranda, P.; Tada, M.;  
27 Kajita, M.; Mano, H.; Ishikawa, S.; Ikegawa, M.; Shimada, T.; et al. Loss of Scribble  
28 Causes Cell Competition in Mammalian Cells. *Journal of Cell Science* **2012**, *125*, 59–  
29 66, doi:10.1242/jcs.085803.



- 1 20. Wagstaff, L.; Goschorska, M.; Kozyrska, K.; Duclos, G.; Kucinski, I.; Chessel, A.;  
2 Neil, L.H.-O. rsquo; Bradshaw, C.R.; Allen, G.E.; Rawlins, E.L.; et al. Mechanical Cell  
3 Competition Kills Cells via Induction of Lethal P53 Levels. *Nature communications*  
4 **2016**, *7*, 1–14, doi:10.1038/ncomms11373.
- 5 21. Bilder, D.; Li, M.; Perrimon, N. Cooperative Regulation of Cell Polarity and  
6 Growth by *Drosophila* Tumor Suppressors. *Science* **2000**, *289*, 113–116,  
7 doi:10.1126/science.289.5476.113.
- 8 22. Bilder, D. Epithelial Polarity and Proliferation Control: Links from the *Drosophila*  
9 Neoplastic Tumor Suppressors. *Genes & development* **2004**, *18*, 1909–1925,  
10 doi:10.1101/gad.1211604.
- 11 23. Nakajima, Y.-I.; Meyer, E.J.; Kroesen, A.; McKinney, S.A.; Gibson, M.C.  
12 Epithelial Junctions Maintain Tissue Architecture by Directing Planar Spindle  
13 Orientation. *Nature* **2013**, *500*, 359–362, doi:10.1038/nature12335.
- 14 24. Nakajima, Y.-I. Mitotic Spindle Orientation in Epithelial Homeostasis and  
15 Plasticity. *Journal of biochemistry* **2018**, *164*, 277–284, doi:10.1093/jb/mvy064.
- 16 25. Lisovsky, M.; Dresser, K.; Baker, S.; Fisher, A.; Woda, B.; Banner, B.; Lauwers,  
17 G.Y. Cell Polarity Protein Lgl2 Is Lost or Aberrantly Localized in Gastric Dysplasia  
18 and Adenocarcinoma: An Immunohistochemical Study. *Modern Pathol* **2009**, *22*, 977–  
19 984, doi:10.1038/modpathol.2009.68.
- 20 26. Pearson, H.B.; Perez-Mancera, P.A.; Dow, L.E.; Ryan, A.; Tennstedt, P.; Bogani,  
21 D.; Elsum, I.; Greenfield, A.; Tuveson, D.A.; Simon, R.; et al. SCRIB expression is  
22 deregulated in human prostate cancer, and its deficiency in mice promotes prostate  
23 neoplasia. *The Journal of clinical investigation* **2011**, *121*, 4257–4267,  
24 doi:10.1172/jci58509.
- 25 27. Zhan, L.; Rosenberg, A.; Bergami, K.C.; Yu, M.; Xuan, Z.; Jaffe, A.B.; Allred, C.;  
26 Muthuswamy, S.K. Deregulation of Scribble Promotes Mammary Tumorigenesis and  
27 Reveals a Role for Cell Polarity in Carcinoma. *Cell* **2008**, *135*, 865–878,  
28 doi:10.1016/j.cell.2008.09.045.

- 1 28. Muthuswamy, S.K.; Xue, B. Cell Polarity as a Regulator of Cancer Cell Behavior  
2 Plasticity. *Annual review of cell and developmental biology* **2012**, *28*, 599–625,  
3 doi:10.1146/annurev-cellbio-092910-154244.
- 4 29. Tomasetti, C.; Marchionni, L.; Nowak, M.A.; Parmigiani, G.; Vogelstein, B. Only  
5 Three Driver Gene Mutations Are Required for the Development of Lung and  
6 Colorectal Cancers. *Proc National Acad Sci* **2015**, *112*, 118–123,  
7 doi:10.1073/pnas.1421839112.
- 8 30. Ciriello, G.; Miller, M.L.; Aksoy, B.A.; Senbabaoglu, Y.; Schultz, N.; Sander, C.  
9 Emerging Landscape of Oncogenic Signatures across Human Cancers. *Nat Genet* **2013**,  
10 *45*, 1127–1133, doi:10.1038/ng.2762.
- 11 31. Brumby, A.M.; Richardson, H.E. scribble mutants cooperate with oncogenic Ras or  
12 Notch to cause neoplastic overgrowth in Drosophila. *The EMBO journal* **2003**, *22*,  
13 5769–5779, doi:10.1093/emboj/cdg548.
- 14 32. Pagliarini, R.A.; Xu, T. A Genetic Screen in Drosophila for Metastatic Behavior.  
15 *Science (New York, NY)* **2003**, *302*, 1227–1231, doi:10.1126/science.1088474.
- 16 33. Tamori, Y.; Suzuki, E.; Deng, W.-M. Epithelial Tumors Originate in Tumor  
17 Hotspots, a Tissue-Intrinsic Microenvironment. *PLoS biology* **2016**, *14*, e1002537-23,  
18 doi:10.1371/journal.pbio.1002537.
- 19 34. Dow, L.E.; Elsum, I.A.; King, C.L.; Kinross, K.M.; Richardson, H.E.; Humbert,  
20 P.O. Loss of Human Scribble Cooperates with H-Ras to Promote Cell Invasion through  
21 Deregulation of MAPK Signalling. *Oncogene* **2008**, *27*, 5988–6001,  
22 doi:10.1038/onc.2008.219.
- 23 35. Elsum, I.A.; Yates, L.L.; Pearson, H.B.; Phesse, T.J.; Long, F.; O’Donoghue, R.;  
24 Ernst, M.; Cullinane, C.; Humbert, P.O. Scrib Heterozygosity Predisposes to Lung  
25 Cancer and Cooperates with KRas Hyperactivation to Accelerate Lung Cancer  
26 Progression in Vivo. *Oncogene* **2014**, *33*, 5523–5533, doi:10.1038/onc.2013.498.
- 27 36. Lee, T.; Luo, L. Mosaic Analysis with a Repressible Cell Marker for Studies of  
28 Gene Function in Neuronal Morphogenesis. *Neuron* **1999**, *22*, 451–461,  
29 doi:10.1016/s0896-6273(00)80701-1.

- 1 37. Struhl, G.; Basler, K. Organizing Activity of Wingless Protein in *Drosophila*. *Cell*  
2 **1993**, *72*, 527–540, doi:10.1016/0092-8674(93)90072-x.
- 3 38. Kessenbrock, K.; Plaks, V.; Werb, Z. Matrix Metalloproteinases: Regulators of the  
4 Tumor Microenvironment. *Cell* **2010**, *141*, 52–67, doi:10.1016/j.cell.2010.03.015.
- 5 39. Uhlirova, M.; Bohmann, D. JNK- and Fos-Regulated Mmp1 Expression Cooperates  
6 with Ras to Induce Invasive Tumors in *Drosophila*. *The EMBO journal* **2006**, *25*, 5294–  
7 5304, doi:10.1038/sj.emboj.7601401.
- 8 40. Chatterjee, N.; Bohmann, D. A Versatile  $\Phi$ C31 Based Reporter System for  
9 Measuring AP-1 and Nrf2 Signaling in *Drosophila* and in Tissue Culture. *PloS one*  
10 **2012**, *7*, e34063, doi:10.1371/journal.pone.0034063.
- 11 41. Gibson, M.C. Extrusion and Death of DPP/BMP-Compromised Epithelial Cells in  
12 the Developing *Drosophila* Wing. *Science (New York, NY)* **2005**, *307*, 1785–1789,  
13 doi:10.1126/science.1104751.
- 14 42. Andersen, D.S.; Colombani, J.; Palmerini, V.; Chakrabandhu, K.; Boone, E.;  
15 Röthlisberger, M.; Toggweiler, J.; Basler, K.; Mapelli, M.; Hueber, A.-O.; et al. The  
16 *Drosophila* TNF Receptor Grindelwald Couples Loss of Cell Polarity and Neoplastic  
17 Growth. *Nature* **2015**, doi:10.1038/nature14298.
- 18 43. Vaughen, J.; Igaki, T. Slit-Robo Repulsive Signaling Extrudes Tumorigenic Cells  
19 from Epithelia. *Developmental Cell* **2016**, *39*, 683–695,  
20 doi:10.1016/j.devcel.2016.11.015.
- 21 44. Bryant, P.J. Pattern Formation in the Imaginal Wing Disc of *Drosophila*  
22 *Melanogaster*: Fate Map, Regeneration and Duplication. *J Exp Zool* **1975**, *193*, 49–77,  
23 doi:10.1002/jez.1401930106.
- 24 45. Sahai, E. Illuminating the Metastatic Process. *Nat Rev Cancer* **2007**, *7*, 737–749,  
25 doi:10.1038/nrc2229.
- 26 46. Egeblad, M.; Rasch, M.G.; Weaver, V.M. Dynamic Interplay between the Collagen  
27 Scaffold and Tumor Evolution. *Curr Opin Cell Biol* **2010**, *22*, 697–706,  
28 doi:10.1016/j.ceb.2010.08.015.

- 1 47. Pastor-Pareja, J.C.; Wu, M.; Xu, T. An Innate Immune Response of Blood Cells to  
2 Tumors and Tissue Damage in *Drosophila*. *Disease Models and Mechanisms* **2008**, *1*,  
3 144-54-discussion 153, doi:10.1242/dmm.000950.
- 4 48. Cordero, J.B.; Macagno, J.P.; Stefanatos, R.K.; Strathdee, K.E.; Cagan, R.L.; Vidal,  
5 M. Oncogenic Ras diverts a host TNF tumor suppressor activity into tumor promoter.  
6 *Developmental Cell* **2010**, *18*, 999–1011, doi:10.1016/j.devcel.2010.05.014.
- 7 49. Parvy, J.-P.; Yu, Y.; Dostalova, A.; Kondo, S.; Kurjan, A.; Bulet, P.; Lemaitre, B.;  
8 Vidal, M.; Cordero, J.B. The Antimicrobial Peptide Defensin Cooperates with Tumour  
9 Necrosis Factor to Drive Tumour Cell Death in *Drosophila*. *eLife* **2019**, *8*, 1543,  
10 doi:10.7554/elife.45061.
- 11 50. Cox, A.D.; Der, C.J. The Dark Side of Ras: Regulation of Apoptosis. *Oncogene*  
12 **2003**, *22*, 8999–9006, doi:10.1038/sj.onc.1207111.
- 13 51. Pylayeva-Gupta, Y.; Grabocka, E.; Bar-Sagi, D. RAS Oncogenes: Weaving a  
14 Tumorigenic Web. *Nat Rev Cancer* **2011**, *11*, 761–774, doi:10.1038/nrc3106.
- 15 52. Enomoto, M.; Kizawa, D.; Ohsawa, S.; Igaki, T. JNK Signaling Is Converted from  
16 Anti- to pro-Tumor Pathway by Ras-Mediated Switch of Warts Activity. *Developmental*  
17 *biology* **2015**, *403*, 162–171, doi:10.1016/j.ydbio.2015.05.001.
- 18 53. Ingber, D.E. Mechanical Control of Tissue Morphogenesis during Embryological  
19 Development. *Int J Dev Biol* **2003**, *50*, 255–266, doi:10.1387/ijdb.052044di.
- 20 54. Ingber, D.E. Cellular Mechanotransduction: Putting All the Pieces Together Again.  
21 *The FASEB Journal* **2006**, *20*, 811–827, doi:10.1096/fj.05-5424rev.
- 22 55. Bilder, D.; Perrimon, N. Localization of Apical Epithelial Determinants by the  
23 Basolateral PDZ Protein Scribble. *Nature* **2000**, *403*, 676–680, doi:10.1038/35001108.

24  
25

## 1 Supplementary Materials

2  
3 **Figure S1.** *nTSG-Ras<sup>V12</sup>* double mutant cells show apical or basal extrusions in wing  
4 imaginal epithelia. (A–C) A wing disc with mosaic mutant clones coexpressing *lg<sup>RNAi</sup>*  
5 and *Ras<sup>V12</sup>* 48 hours after clone induction. Mutant clones were marked with GFP  
6 expression (green) in (A–B). Basement membranes were labeled with anti-Laminin  $\gamma$   
7 antibody (red) in (A, C). The images are z-stack projections of 30 confocal images of  
8 the columnar epithelial layer. Lower panels: vertical sections at a site indicated by a  
9 white line in each upper panel. A yellow arrowhead: apically extruded mutant clones.  
10 Magenta arrows: basally extruded mutant clones. PM: peripodial membrane. (D) A  
11 wing imaginal disc with mosaic clones expressing GFP (green) 96 hours after clone  
12 induction, stained for F-actin (red). The images are z-stack projections of 30 confocal  
13 images of the columnar epithelial layer. (E) F-actin detected by Phalloidin staining in  
14 the mosaic wing disc in (D). (F) Laminin detected by anti-Laminin- $\gamma$  antibody staining  
15 (white) in the mosaic wing disc in (D). The images are z-stack projections of 30  
16 confocal images of the columnar epithelial layer. Lower panels: vertical sections at a  
17 site indicated by a white line in each upper panel. Nuclei were labeled with DAPI (blue)  
18 in (A–D). Scale bars represent 50  $\mu\text{m}$ .

19  
20 **Figure S2.** JNK-MMP1 signaling is not endogenously activated in wing imaginal  
21 epithelia. (A) A wing imaginal disc with mosaic clones expressing GFP (green) 96  
22 hours after clone induction. (B) JNK activation detected by TRE-DsRed in the mosaic  
23 wing disc in (A). (C) MMP1 expression detected by anti-MMP1 antibody staining  
24 (white) in the mosaic wing disc in (A). The images are z-stack projections of 30  
25 confocal images of the columnar epithelial layer. White arrowheads indicate  
26 endogenous MMP1 expression in the trachea. Nuclei were labeled with DAPI (blue).  
27 Scale bars represent 50  $\mu\text{m}$ .

28  
29 **Figure S3.** *lg<sup>RNAi</sup>-Ras<sup>V12</sup>* co-expression induces MMP1 upregulation in the invasion  
30 hotspot. (A) A wing imaginal disc with *GMR17G12-Gal4*-driven RFP expression (red)  
31 in the dorsal hinge region stained for MMP1 (green). (B) *GMR17G12-Gal4*-induced  
32 RFP expression pattern (red) in the wing disc (A). (C) MMP1 expression pattern  
33 (green) in the wing disc (A). (D) A wing imaginal disc with *GMR17G12-Gal4*-driven  
34 *lg<sup>RNAi</sup>* and *Ras<sup>V12</sup>* expression in the dorsal hinge region stained for MMP1 (green).  
35 *GMR17G12-Gal4* expressing regions were labeled by RFP (red). (E) *GMR17G12-Gal4*-  
36 induced RFP expression pattern (red) in the wing disc (D). (F) MMP1 expression

- 1 pattern (green) in the wing disc (**D**). Magenta arrowheads indicate invasion hotspots.
- 2 White arrowheads indicate endogenous MMP1 expression in the trachea. Nuclei were
- 3 labeled with DAPI (blue). Scale bars represent 50  $\mu\text{m}$ .
- 4
